# Supplementary material
Source: PubMed Central journal article supplement (PMC5996985)

**Table S1. High and Low Prison and Probation Recidivism States**

| <b>Prison Recidivism Rates</b> |               |            | <b>Probation Failure Rates</b> |               |            |
|--------------------------------|---------------|------------|--------------------------------|---------------|------------|
| <i>High</i>                    | <i>Median</i> | <i>Low</i> | <i>High</i>                    | <i>Median</i> | <i>Low</i> |
| AK                             | AL            | MI         | AL                             | AK            | AR         |
| AR                             | AZ            | MS         | IN                             | CO            | AZ         |
| CA                             | CO            | NE         | MI                             | CT            | CA         |
| CT                             | DE            | OK         | NE                             | DE            | FL         |
| IL                             | GA            | OR         | NH                             | GA            | MD         |
| KS                             | HI            | RI         | OK                             | HI            | MS         |
| MN                             | ID            | SC         | PA                             | IA            | ND         |
| MO                             | IN            | TX         | RI                             | ID            | NM         |
| NH                             | IA            | VA         | SD                             | IL            | VA         |
| NJ                             | KY            | WV         | TN                             | KS            | WY         |
| NM                             | LA            | WY         | WA                             | KY            |            |
| SD                             | MA            |            |                                | MA            |            |
| UT                             | ME            |            |                                | ME            |            |
| WA                             | MD            |            |                                | MN            |            |
| WI                             | MT            |            |                                | MO            |            |
|                                | NV            |            |                                | MT            |            |
|                                | NY            |            |                                | NC            |            |
|                                | NC            |            |                                | NJ            |            |
|                                | ND            |            |                                | NV            |            |
|                                | OH            |            |                                | NY            |            |
|                                | PA            |            |                                | OH            |            |
|                                | TN            |            |                                | OR            |            |
|                                | VT            |            |                                | SC            |            |
|                                |               |            |                                | TX            |            |
|                                |               |            |                                | UT            |            |
|                                |               |            |                                | VT            |            |
|                                |               |            |                                | WI            |            |
|                                |               |            |                                | WV            |            |

**Table S2. Current and Formerly Incarcerated Adults 1980 (in thousands)**

| State | Overall |         |                                     |                |                         |            |       | African American |                                   |                   |                            |            |
|-------|---------|---------|-------------------------------------|----------------|-------------------------|------------|-------|------------------|-----------------------------------|-------------------|----------------------------|------------|
|       | Curr.   | % Curr. | Est. Ex-Prisoners Lower-Upper Bound | % Ex-Prisoners | Total Lower-Upper Bound | % Tot.     | Curr. | % Curr.          | Est. AA Ex-Pris Lower-Upper Bound | % AA Ex-Prisoners | Total AA Lower-Upper Bound | % Tot.     |
| AL    | 6       | 0.2%    | 22 - 27                             | 0.8 - 1%       | 28 - 33                 | 1 - 1.2%   | 4     | 1%               | 8 - 11                            | 1 - 2%            | 12 - 14                    | 1.9 - 2%   |
| AK    | 1       | 0.2%    | 0.8 - 1                             | 0.3 - 0.4%     | 1 - 2                   | 0.5 - 0.6% | 0.1   | 1%               | 0.07 - 0.1                        | 0.8 - 1%          | 0.12 - 0.14                | 1 - 1.5%   |
| AZ    | 4       | 0.2%    | 8 - 10                              | 0.4 - 0.5%     | 13 - 15                 | 0.7 - 0.8% | 1     | 2%               | 2 - 3                             | 5 - 6%            | 3 - 4                      | 7 - 8%     |
| AR    | 3       | 0.2%    | 11 - 14                             | 0.7 - 0.9%     | 14 - 17                 | 0.9 - 1%   | 1     | 1%               | 4 - 5                             | 1.6 - 2%          | 5 - 6                      | 2 - 3%     |
| CA    | 23      | 0.1%    | 71 - 88                             | 0.4 - 0.5%     | 94 - 111                | 0.5 - 0.6% | 8     | 1%               | 16 - 22                           | 1 - 2%            | 24 - 29                    | 2 - 2.4%   |
| CO    | 3       | 0.1%    | 12 - 15                             | 0.6 - 0.7%     | 14 - 18                 | 0.7 - 0.8% | 0.5   | 1%               | 1.5 - 2                           | 2 - 3%            | 2 - 2.4                    | 3 - 4%     |
| CT    | 3       | 0.1%    | 12 - 15                             | 0.5 - 0.6%     | 15 - 18                 | 0.6 - 0.8% | 1     | 1%               | 4 - 5                             | 3 - 4%            | 5 - 6                      | 4 - 5%     |
| DE    | 1       | 0.3%    | 1.5 - 2                             | 0.3 - 0.4%     | 2.7 - 3.1               | 0.6 - 0.7% | 1     | 1%               | 0.7 - 1                           | 1 - 1.4%          | 1 - 1.5                    | 2 - 2.4%   |
| FL    | 20      | 0.3%    | 41 - 51                             | 0.5 - 0.7%     | 62 - 71                 | 0.8 - 1%   | 9     | 1%               | 15 - 20                           | 1.8 - 2.3%        | 25 - 29                    | 2.9 - 3.4% |
| GA    | 12      | 0.3%    | 32 - 40                             | 0.8 - 1%       | 44 - 52                 | 1 - 1.3%   | 6     | 1%               | 15 - 19                           | 1.6 - 2%          | 21 - 25                    | 2 - 3%     |
| HI    | 1       | 0.1%    | 0.9 - 1                             | 0.1 - 0.2%     | 1.5 - 2                 | 0.2 - 0.3% | 0.03  | 0.3%             | 0.01 - 0.02                       | 0.1 - 0.14%       | 0.045 - 0.05               | 0.3 - 0.4% |
| ID    | 1       | 0.1%    | 3 - 4                               | 0.5 - 1%       | 4 - 5                   | 0.6 - 1%   | 0.02  | 0.3%             | 0.11 - 0.14                       | 2 - 3%            | 0.12 - 0.16                | 3 - 4%     |
| IL    | 11      | 0.1%    | 34 - 42                             | 0.4 - 0.5%     | 45 - 53                 | 0.5 - 1%   | 6     | 1%               | 14 - 19                           | 1.4 - 2%          | 22 - 25                    | 2 - 2.4%   |
| IN    | 6       | 0.2%    | 17 - 21                             | 0.4 - 0.5%     | 23 - 27                 | 0.6 - 0.7% | 2     | 1%               | 4 - 5                             | 1.5 - 2%          | 6 - 7                      | 2 - 3%     |
| IA    | 2       | 0.1%    | 7 - 9                               | 0.3 - 0.4%     | 10 - 12                 | 0.5 - 0.6% | 0.4   | 1%               | 0.5 - 1                           | 2 - 3%            | 0.9 - 1                    | 3 - 4%     |
| KS    | 2       | 0.1%    | 11 - 14                             | 0.6 - 0.8%     | 13 - 16                 | 0.8 - 1%   | 1     | 1%               | 2 - 3                             | 2.5 - 3%          | 3 - 3.4                    | 3 - 4%     |
| KY    | 4       | 0.1%    | 17 - 21                             | 0.7 - 0.8%     | 21 - 25                 | 0.8 - 1%   | 1     | 0.5%             | 2.6 - 3                           | 1.5 - 2%          | 3 - 4                      | 2 - 2.4%   |
| LA    | 9       | 0.3%    | 15 - 19                             | 0.5 - 0.6%     | 24 - 28                 | 0.8 - 1%   | 6     | 1%               | 13 - 16                           | 1.6 - 2%          | 19 - 23                    | 2 - 3%     |
| ME    | 1       | 0.1%    | 5 - 6                               | 0.6 - 0.8%     | 5 - 7                   | 0.7 - 0.8% | 0.01  | 0.3%             | 0.01 - 0.02                       | 0.5 - 1%          | 0.02 - 0.024               | 0.8 - 1%   |
| MD    | 8       | 0.3%    | 33 - 42                             | 1 - 1.4%       | 41 - 50                 | 1 - 2%     | 4     | 1%               | 18 - 23                           | 3 - 4%            | 21 - 26                    | 3 - 4%     |
| MA    | 3       | 0.1%    | 10 - 13                             | 0.2 - 0.3%     | 13 - 16                 | 0.3 - 0.4% | 1     | 1%               | 1.6 - 2                           | 1 - 1.4%          | 2.6 - 3                    | 1.8 - 2%   |
| MI    | 15      | 0.2%    | 39 - 59                             | 0.6 - 0.9%     | 54 - 74                 | 0.8 - 1%   | 8     | 1%               | 14 - 20                           | 2 - 3%            | 23 - 28                    | 3 - 4%     |
| MN    | 2       | 0.1%    | 8 - 11                              | 0.3 - 0.4%     | 10 - 12                 | 0.3 - 0.4% | 0.3   | 1%               | 1 - 1.4                           | 3 - 4%            | 1 - 2                      | 4 - 5%     |
| MS    | 4       | 0.2%    | 9 - 13                              | 0.5 - 0.7%     | 13 - 17                 | 0.7 - 1%   | 2     | 0.5%             | 4 - 6                             | 0.8 - 1%          | 7 - 8                      | 1 - 2%     |
| MO    | 6       | 0.2%    | 17 - 22                             | 0.5 - 0.6%     | 23 - 27                 | 0.6 - 0.8% | 2     | 1%               | 5 - 7                             | 1.6 - 2%          | 7 - 9                      | 2 - 3%     |
| MT    | 1       | 0.1%    | 3 - 4                               | 0.6 - 0.8%     | 4 - 5                   | 0.7 - 0.9% | 0.01  | 1%               | 0.06 - 0.08                       | 6 - 7%            | 0.07 - 0.09                | 7 - 8%     |
| NE    | 1       | 0.1%    | 6 - 9                               | 0.5 - 0.8%     | 7 - 10                  | 0.6 - 0.9% | 0.3   | 1%               | 1 - 1.4                           | 3 - 5%            | 1 - 2                      | 4 - 6%     |
| NV    | 2       | 0.3%    | 3 - 4                               | 0.6 - 0.7%     | 5 - 6                   | 0.9 - 1%   | 1     | 2%               | 0.8 - 1                           | 2.5 - 3%          | 1 - 2                      | 4 - 5%     |
| NH    | 0.3     | 0.1%    | 1 - 2                               | 0.2 - 0.3%     | 1.7 - 2                 | 0.2 - 0.3% | 0.01  | 0.2%             | 0.005 - 0.01                      | 0.2 - 0.3%        | 0.01 - 0.012               | 0.4 - 0.5% |
| NJ    | 6       | 0.1%    | 27 - 33                             | 0.5 - 0.6%     | 32 - 39                 | 0.6 - 0.7% | 3     | 1%               | 9 - 12                            | 1 - 2%            | 12 - 15                    | 2 - 3%     |
| NM    | 1       | 0.1%    | 5 - 6                               | 0.6 - 0.7%     | 6 - 8                   | 0.7 - 0.8% | 0.1   | 1%               | 1 - 1.3                           | 6 - 9%            | 1 - 1.5                    | 8 - 10%    |
| NY    | 22      | 0.2%    | 60 - 74                             | 0.5 - 0.6%     | 81 - 96                 | 0.6 - 1%   | 11    | 1%               | 32 - 41                           | 2 - 3%            | 42 - 51                    | 3 - 3.2%   |
| NC    | 14      | 0.3%    | 34 - 42                             | 0.8 - 1%       | 49 - 56                 | 1 - 1.3%   | 7     | 1%               | 14 - 18                           | 1.6 - 2%          | 21 - 25                    | 2 - 3%     |
| ND    | 0.2     | 0.04%   | 1 - 2                               | 0.3 - 0.4%     | 1.5 - 2                 | 0.3 - 0.4% | 0.002 | 0.1%             | 0.05 - 0.07                       | 3 - 4%            | 0.05 - 0.07                | 3 - 4%     |
| OH    | 13      | 0.2%    | 47 - 58                             | 0.6 - 0.7%     | 60 - 71                 | 0.8 - 0.9% | 5     | 1%               | 15 - 19                           | 2 - 3%            | 20 - 25                    | 3 - 4%     |
| OK    | 5       | 0.2%    | 17 - 25                             | 0.8 - 1%       | 22 - 30                 | 1 - 1.4%   | 1     | 1%               | 4 - 5                             | 3 - 4%            | 5 - 7                      | 4 - 5%     |
| OR    | 3       | 0.2%    | 11 - 16                             | 0.6 - 0.9%     | 14 - 20                 | 0.7 - 1%   | 0.3   | 1%               | 0.9 - 1.2                         | 4 - 5%            | 1 - 2                      | 5 - 7%     |
| PA    | 8       | 0.1%    | 26 - 32                             | 0.3 - 0.4%     | 34 - 40                 | 0.4 - 0.5% | 4     | 1%               | 9 - 11                            | 1 - 2%            | 12 - 15                    | 1.7 - 2.1% |
| RI    | 1       | 0.1%    | 2 - 3                               | 0.2 - 0.4%     | 2 - 3                   | 0.3 - 0.4% | 0.1   | 1%               | 0.2 - 0.3                         | 1 - 2%            | 0.4 - 0.5                  | 2 - 3%     |
| SC    | 7       | 0.3%    | 19 - 27                             | 0.9 - 1%       | 27 - 34                 | 1 - 2%     | 4     | 1%               | 8 - 10                            | 1 - 2%            | 11 - 13                    | 1.9 - 2.2% |
| SD    | 1       | 0.1%    | 3 - 4                               | 0.6 - 0.7%     | 3 - 4                   | 0.7 - 0.9% | 0.02  | 1%               | 0.03 - 0.04                       | 2 - 3%            | 0.05 - 0.06                | 3 - 4%     |
| TN    | 7       | 0.2%    | 15 - 19                             | 0.5 - 0.6%     | 22 - 26                 | 0.7 - 0.8% | 3     | 1%               | 5 - 7                             | 1 - 2%            | 8 - 9                      | 1.7 - 2%   |
| TX    | 30      | 0.3%    | 54 - 82                             | 0.5 - 1%       | 84 - 112                | 0.8 - 1%   | 12    | 1%               | 16 - 23                           | 1 - 2%            | 28 - 34                    | 2 - 3%     |
| UT    | 1       | 0.1%    | 2 - 3                               | 0.2 - 0.3%     | 3 - 4                   | 0.3 - 0.4% | 0.1   | 1%               | 0.2 - 0.3                         | 3 - 4%            | 0.3 - 0.4                  | 5 - 6%     |
| VT    | 0.3     | 0.1%    | 2 - 2.3                             | 0.5 - 0.6%     | 2 - 3                   | 0.6 - 0.7% | 0.01  | 1%               | 0.016 - 0.02                      | 2 - 3%            | 0.02 - 0.03                | 3 - 4%     |
| VA    | 9       | 0.2%    | 20 - 30                             | 0.5 - 0.8%     | 29 - 39                 | 0.7 - 1%   | 4     | 1%               | 9 - 12                            | 1 - 2%            | 13 - 16                    | 2 - 2.4%   |
| WA    | 4       | 0.1%    | 14 - 18                             | 0.5 - 0.6%     | 19 - 22                 | 0.6 - 0.8% | 0.8   | 1%               | 1.7 - 2                           | 2 - 3%            | 2.5 - 3                    | 3 - 4%     |
| WV    | 1       | 0.1%    | 5 - 8                               | 0.4 - 0.6%     | 7 - 9                   | 0.5 - 0.7% | 0.1   | 0.3%             | 0.7 - 1                           | 1 - 2%            | 0.8 - 1.2                  | 2 - 3%     |
| WI    | 4       | 0.1%    | 15 - 18                             | 0.4 - 0.6%     | 19 - 22                 | 0.6 - 0.7% | 1     | 1%               | 3 - 4                             | 3 - 4%            | 4 - 5                      | 4 - 5%     |
| WY    | 1       | 0.2%    | 2 - 3                               | 0.5 - 1%       | 2 - 3                   | 0.7 - 1%   | 0.02  | 1%               | 0.08 - 0.12                       | 3 - 5%            | 0.1 - 0.14                 | 4 - 6%     |

**Table S3. Current and Formerly Incarcerated Adults 1990 (in thousands)**

| State | Overall |         |                                     |                |                         |            | African American |         |                                   |                   |                            |          |
|-------|---------|---------|-------------------------------------|----------------|-------------------------|------------|------------------|---------|-----------------------------------|-------------------|----------------------------|----------|
|       | Curr.   | % Curr. | Est. Ex-Prisoners Lower-Upper Bound | % Ex-Prisoners | Total Lower-Upper Bound | % Tot.     | Curr.            | % Curr. | Est. AA Ex-Pris Lower-Upper Bound | % AA Ex-Prisoners | Total AA Lower-Upper Bound | % Tot.   |
| AL    | 16      | 0.5%    | 31 - 38                             | 1 - 2%         | 46 - 54                 | 1 - 2%     | 10               | 1%      | 12 - 17                           | 1 - 2%            | 22 - 26                    | 3 - 4%   |
| AK    | 3       | 0.7%    | 4 - 5                               | 1 - 2%         | 6 - 7                   | 1 - 2%     | 0.3              | 2%      | 0.4 - 1                           | 3 - 7%            | 0.7 - 1                    | 5 - 9%   |
| AZ    | 14      | 0.5%    | 21 - 25                             | 0.8 - 1%       | 35 - 40                 | 1 - 2%     | 2                | 3%      | 4 - 6                             | 7 - 9%            | 7 - 8                      | 10 - 12% |
| AR    | 7       | 0.4%    | 17 - 22                             | 1 - 2%         | 24 - 29                 | 1 - 2%     | 3                | 1%      | 6 - 9                             | 3 - 4%            | 9 - 12                     | 4 - 5%   |
| CA    | 97      | 0.4%    | 232 - 289                           | 1 - 2%         | 329 - 387               | 1 - 2%     | 36               | 3%      | 66 - 93                           | 5 - 7%            | 102 - 129                  | 8 - 10%  |
| CO    | 7       | 0.3%    | 17 - 21                             | 0.7 - 1%       | 24 - 28                 | 1 - 2%     | 2                | 2%      | 2 - 3                             | 2 - 3%            | 4 - 5                      | 4 - 5%   |
| CT    | 11      | 0.4%    | 25 - 31                             | 1 - 2%         | 37 - 42                 | 1 - 2%     | 7                | 4%      | 9 - 13                            | 5 - 7%            | 16 - 20                    | 8 - 10%  |
| DE    | 3       | 0.7%    | 3 - 4                               | 0.7 - 1%       | 7 - 8                   | 1 - 2%     | 2                | 3%      | 1 - 2                             | 2 - 3%            | 3 - 4                      | 4 - 5%   |
| FL    | 44      | 0.4%    | 128 - 157                           | 1 - 2%         | 172 - 202               | 1 - 2%     | 25               | 2%      | 53 - 73                           | 5 - 6%            | 78 - 98                    | 7 - 8%   |
| GA    | 22      | 0.5%    | 64 - 80                             | 1 - 2%         | 87 - 102                | 1 - 2%     | 15               | 1%      | 30 - 41                           | 2 - 3%            | 44 - 56                    | 4 - 5%   |
| HI    | 3       | 0.3%    | 2 - 3                               | 0.3 - 0.4%     | 5 - 6                   | 0.6 - 1%   | 0.2              | 1%      | 0.1 - 0.2                         | 0.7 - 1%          | 0.2 - 0.3                  | 1 - 2%   |
| ID    | 2       | 0.3%    | 6 - 7                               | 0.8 - 1%       | 8 - 9                   | 1 - 2%     | 0.03             | 1%      | 0.1 - 0.2                         | 4 - 6%            | 0.1 - 0.2                  | 5 - 7%   |
| IL    | 28      | 0.3%    | 62 - 79                             | 0.8 - 1%       | 90 - 106                | 1 - 2%     | 19               | 2%      | 29 - 41                           | 2 - 4%            | 47 - 60                    | 4 - 5%   |
| IN    | 13      | 0.3%    | 28 - 34                             | 0.7 - 1%       | 40 - 47                 | 1 - 2%     | 5                | 2%      | 8 - 11                            | 2 - 4%            | 13 - 16                    | 4 - 5%   |
| IA    | 4       | 0.2%    | 13 - 16                             | 0.7 - 1%       | 17 - 20                 | 0.8 - 1%   | 1                | 3%      | 1 - 2                             | 4 - 5%            | 2 - 3                      | 6 - 8%   |
| KS    | 6       | 0.3%    | 16 - 21                             | 0.9 - 1%       | 22 - 27                 | 1 - 2%     | 2                | 2%      | 3 - 5                             | 3 - 5%            | 5 - 7                      | 6 - 7%   |
| KY    | 9       | 0.3%    | 23 - 29                             | 0.9 - 1%       | 33 - 38                 | 1 - 2%     | 3                | 1%      | 4 - 5                             | 2 - 3%            | 6 - 8                      | 3 - 4%   |
| LA    | 19      | 0.6%    | 27 - 34                             | 0.9 - 1%       | 46 - 52                 | 1 - 2%     | 13               | 2%      | 22 - 30                           | 3 - 4%            | 35 - 44                    | 4 - 5%   |
| ME    | 2       | 0.2%    | 6 - 7                               | 0.6 - 1%       | 7 - 9                   | 0.8 - 1%   | 0.03             | 1%      | 0.02 - 0.03                       | 0.7 - 1%          | 0.05 - 0.06                | 1 - 2%   |
| MD    | 18      | 0.5%    | 41 - 51                             | 1 - 2%         | 59 - 69                 | 1 - 2%     | 14               | 2%      | 21 - 29                           | 2 - 3%            | 35 - 43                    | 4 - 5%   |
| MA    | 8       | 0.2%    | 17 - 21                             | 0.4 - 0.5%     | 25 - 29                 | 0.5 - 1%   | 3                | 2%      | 3 - 5                             | 1 - 2%            | 7 - 8                      | 3 - 4%   |
| MI    | 34      | 0.5%    | 52 - 81                             | 0.8 - 1%       | 86 - 115                | 1 - 2%     | 20               | 2%      | 22 - 28                           | 2 - 3%            | 42 - 48                    | 4 - 5%   |
| MN    | 3       | 0.1%    | 12 - 16                             | 0.4 - 0.5%     | 15 - 19                 | .5 - 1%    | 1                | 2%      | 2 - 3                             | 4 - 5%            | 3 - 4                      | 5 - 7%   |
| MS    | 8       | 0.5%    | 17 - 21                             | 0.9 - 1%       | 25 - 30                 | 1 - 2%     | 6                | 1%      | 9 - 11                            | 1 - 2%            | 15 - 17                    | 2 - 3%   |
| MO    | 15      | 0.4%    | 29 - 37                             | 0.8 - 1%       | 44 - 52                 | 1 - 2%     | 7                | 2%      | 8 - 12                            | 2 - 3%            | 15 - 19                    | 4 - 5%   |
| MT    | 1       | 0.3%    | 4 - 5                               | 0.7 - 1%       | 6 - 7                   | 1 - 2%     | 0.02             | 2%      | 0.07 - 0.09                       | 6 - 8%            | 0.09 - 0.1                 | 7 - 10%  |
| NE    | 2       | 0.2%    | 7 - 10                              | 0.6 - 1%       | 10 - 12                 | 0.8 - 1%   | 1                | 2%      | 1 - 2                             | 4 - 5%            | 2 - 3                      | 6 - 7%   |
| NV    | 5       | 0.6%    | 9 - 12                              | 1 - 2%         | 15 - 17                 | 1 - 2%     | 2                | 3%      | 2 - 3                             | 5 - 6%            | 4 - 5                      | 8 - 9%   |
| NH    | 1       | 0.2%    | 2 - 3                               | 0.2 - 0.3%     | 3 - 4                   | 0.4 - 0.5% | 0.1              | 1%      | 0.03 - 0.04                       | 0.6 - 1%          | 0.09 - 0.1                 | 1 - 2%   |
| NJ    | 21      | 0.4%    | 39 - 50                             | 0.7 - 1%       | 61 - 71                 | 1 - 2%     | 14               | 2%      | 16 - 23                           | 2 - 3%            | 30 - 37                    | 4 - 5%   |
| NM    | 3       | 0.3%    | 9 - 12                              | 0.9 - 1%       | 12 - 15                 | 1 - 2%     | 0.3              | 2%      | 1 - 2                             | 9 - 12%           | 2 - 3                      | 10 - 14% |
| NY    | 55      | 0.4%    | 102 - 127                           | 0.7 - 1%       | 157 - 182               | 1 - 2%     | 28               | 1%      | 54 - 75                           | 3 - 4%            | 82 - 103                   | 4 - 5%   |
| NC    | 18      | 0.4%    | 69 - 85                             | 1 - 2%         | 87 - 104                | 1 - 2%     | 11               | 1%      | 29 - 40                           | 3 - 4%            | 40 - 51                    | 4 - 5%   |
| ND    | 0.5     | 0.1%    | 2 - 3                               | 0.4 - 0.5%     | 2 - 3                   | 0.5 - 1%   | 0.01             | 0.2%    | 0.05 - 0.07                       | 3 - 4%            | 0.06 - 0.08                | 3 - 4%   |
| OH    | 32      | 0.4%    | 77 - 96                             | 1 - 2%         | 109 - 128               | 1 - 2%     | 17               | 2%      | 28 - 39                           | 4 - 5%            | 45 - 55                    | 6 - 7%   |
| OK    | 12      | 0.5%    | 28 - 37                             | 1 - 2%         | 41 - 49                 | 1 - 2%     | 4                | 3%      | 7 - 9                             | 5 - 6%            | 12 - 14                    | 8 - 9%   |
| OR    | 3       | 0.2%    | 21 - 27                             | 1 - 2%         | 25 - 31                 | 1 - 2%     | 0.5              | 2%      | 2 - 3                             | 7 - 9%            | 2 - 3                      | 9 - 10%  |
| PA    | 22      | 0.3%    | 37 - 46                             | 0.4 - 0.5%     | 59 - 68                 | .7 - 1%    | 12               | 2%      | 12 - 16                           | 1 - 2%            | 24 - 28                    | 3 - 4%   |
| RI    | 2       | 0.3%    | 3 - 4                               | 0.4 - 0.5%     | 5 - 6                   | 0.7 - 1%   | 1                | 3%      | 0.5 - 1                           | 1 - 2%            | 1 - 2                      | 4 - 5%   |
| SC    | 12      | 0.5%    | 30 - 40                             | 1 - 2%         | 43 - 52                 | 1 - 2%     | 8                | 1%      | 14 - 17                           | 2 - 3%            | 22 - 25                    | 3 - 4%   |
| SD    | 1       | 0.3%    | 4 - 5                               | 0.9 - 1%       | 5 - 7                   | 1 - 2%     | 0.04             | 3%      | 0.06 - 0.09                       | 4 - 6%            | 0.10 - 0.13                | 7 - 8%   |
| TN    | 10      | 0.3%    | 25 - 31                             | 0.7 - 1%       | 36 - 42                 | 1 - 2%     | 5                | 1%      | 9 - 13                            | 2 - 3%            | 14 - 18                    | 3 - 4%   |
| TX    | 50      | 0.4%    | 116 - 147                           | 1 - 2%         | 166 - 197               | 1 - 2%     | 24               | 2%      | 38 - 47                           | 3 - 4%            | 62 - 71                    | 4 - 5%   |
| UT    | 2       | 0.2%    | 5 - 6                               | 0.5 - 1%       | 7 - 9                   | .7 - 1%    | 0.2              | 3%      | 0.4 - 1                           | 5 - 7%            | 0.6 - 1                    | 8 - 10%  |
| VT    | 1       | 0.2%    | 3 - 4                               | 0.7 - 1%       | 3 - 4                   | 0.8 - 1%   | 0.01             | 1%      | 0.03 - 0.04                       | 3 - 4%            | 0.04 - 0.05                | 4 - 5%   |
| VA    | 18      | 0.4%    | 38 - 49                             | 0.8 - 1%       | 55 - 66                 | 1 - 2%     | 11               | 1%      | 18 - 22                           | 2 - 3%            | 29 - 33                    | 3 - 4%   |
| WA    | 8       | 0.2%    | 20 - 26                             | 0.6 - 1%       | 28 - 34                 | 0.8 - 1%   | 2                | 2%      | 3 - 4                             | 3 - 4%            | 4 - 5                      | 5 - 6%   |
| WV    | 2       | 0.1%    | 6 - 8                               | 0.4 - 0.6%     | 8 - 10                  | 0.6 - 1%   | 0.2              | 1%      | 0.8 - 1                           | 2 - 3%            | 1 - 2                      | 2 - 3%   |
| WI    | 7       | 0.2%    | 19 - 24                             | 0.5 - 1%       | 27 - 32                 | 0.7 - 1%   | 3                | 2%      | 4 - 6                             | 3 - 4%            | 7 - 9                      | 5 - 6%   |
| WY    | 1       | 0.4%    | 2 - 3                               | 0.8 - 1%       | 3 - 4                   | 1 - 2%     | 0.1              | 3%      | 0.1 - 0.13                        | 4 - 6%            | 0.16 - 0.19                | 7 - 9%   |

**Table S4. Current and Formerly Incarcerated Adults 2000 (in thousands)**

| State | Overall |         |                                     |                |                         |          | African American |         |                                   |                   |                            |          |
|-------|---------|---------|-------------------------------------|----------------|-------------------------|----------|------------------|---------|-----------------------------------|-------------------|----------------------------|----------|
|       | Curr.   | % Curr. | Est. Ex-Prisoners Lower-Upper Bound | % Ex-Prisoners | Total Lower-Upper Bound | % Tot.   | Curr.            | % Curr. | Est. AA Ex-Pris Lower-Upper Bound | % AA Ex-Prisoners | Total AA Lower-Upper Bound | % Tot.   |
| AL    | 26      | 1%      | 49 - 60                             | 1 - 2%         | 75 - 86                 | 2 - 3%   | 17               | 2%      | 23 - 29                           | 3 - 4%            | 40 - 47                    | 5 - 6%   |
| AK    | 2       | 0.5%    | 9 - 11                              | 2 - 3%         | 11 - 13                 | 2 - 3%   | 0.3              | 2%      | 1 - 2                             | 6 - 9%            | 1 - 2                      | 8 - 10%  |
| AZ    | 27      | 1%      | 43 - 53                             | 1 - 2%         | 69 - 80                 | 2 - 3%   | 4                | 3%      | 8 - 10                            | 6 - 7%            | 12 - 14                    | 9 - 10%  |
| AR    | 12      | 1%      | 32 - 40                             | 1 - 2%         | 44 - 52                 | 2 - 3%   | 7                | 2%      | 14 - 17                           | 5 - 6%            | 20 - 24                    | 7 - 9%   |
| CA    | 163     | 1%      | 586 - 727                           | 2 - 3%         | 754 - 890               | 3 - 4%   | 80               | 4%      | 169 - 211                         | 9 - 11%           | 250 - 291                  | 14 - 16% |
| CO    | 17      | 1%      | 29 - 36                             | 1 - 2%         | 46 - 53                 | 1 - 2%   | 4                | 3%      | 7 - 8                             | 5 - 6%            | 11 - 13                    | 8 - 9%   |
| CT    | 13      | 1%      | 31 - 39                             | 1 - 2%         | 45 - 53                 | 1 - 2%   | 8                | 4%      | 14 - 18                           | 7 - 8%            | 23 - 27                    | 10 - 12% |
| DE    | 4       | 1%      | 7 - 9                               | 1 - 2%         | 11 - 13                 | 2 - 3%   | 3                | 2%      | 4 - 5                             | 3 - 4%            | 6 - 7                      | 6 - 7%   |
| FL    | 71      | 1%      | 178 - 223                           | 1 - 2%         | 249 - 294               | 2 - 3%   | 39               | 2%      | 83 - 106                          | 5 - 7%            | 122 - 146                  | 8 - 9%   |
| GA    | 44      | 1%      | 97 - 121                            | 1 - 2%         | 141 - 165               | 2 - 3%   | 30               | 2%      | 54 - 68                           | 3 - 4%            | 84 - 98                    | 5 - 6%   |
| HI    | 4       | 0.4%    | 7 - 10                              | 0.8 - 1%       | 11 - 13                 | 1 - 2%   | 0.2              | 1%      | 0.4 - 0.5                         | 1 - 2%            | 0.6 - 0.7                  | 2 - 3%   |
| ID    | 6       | 1%      | 11 - 13                             | 1 - 2%         | 16 - 19                 | 1 - 2%   | 0.1              | 2%      | 0.3 - 0.4                         | 4 - 5%            | 0.4 - 0.5                  | 6 - 7%   |
| IL    | 45      | 1%      | 155 - 190                           | 1 - 2%         | 200 - 235               | 2 - 3%   | 33               | 3%      | 105 - 125                         | 8 - 10%           | 135 - 158                  | 11 - 13% |
| IN    | 20      | 0.5%    | 49 - 60                             | 1 - 2%         | 70 - 80                 | 1 - 2%   | 9                | 2%      | 21 - 26                           | 6 - 7%            | 30 - 34                    | 9 - 10%  |
| IA    | 8       | 0.4%    | 23 - 28                             | 1 - 2%         | 31 - 36                 | 1 - 2%   | 2                | 5%      | 2 - 3                             | 6 - 7%            | 4 - 5                      | 10 - 12% |
| KS    | 8       | 0.4%    | 27 - 33                             | 1 - 2%         | 35 - 41                 | 1 - 2%   | 3                | 3%      | 8 - 10                            | 7 - 9%            | 12 - 13                    | 10 - 12% |
| KY    | 15      | 1%      | 41 - 51                             | 1 - 2%         | 56 - 66                 | 1 - 2%   | 6                | 3%      | 10 - 13                           | 5 - 6%            | 16 - 18                    | 8 - 9%   |
| LA    | 35      | 1%      | 67 - 81                             | 2 - 3%         | 102 - 116               | 3 - 4%   | 27               | 3%      | 52 - 65                           | 5 - 7%            | 79 - 92                    | 8 - 10%  |
| ME    | 2       | 0.2%    | 7 - 8                               | 0.7 - 1%       | 8 - 10                  | 0.9 - 1% | 0.1              | 1%      | 0.06 - 0.07                       | 0.8 - 1%          | 0.12 - 0.14                | 1 - 2%   |
| MD    | 24      | 1%      | 63 - 77                             | 1 - 2%         | 86 - 101                | 2 - 3%   | 18               | 2%      | 39 - 49                           | 4 - 5%            | 57 - 67                    | 5 - 6%   |
| MA    | 11      | 0.2%    | 27 - 33                             | 0.6 - 1%       | 38 - 44                 | 0.8 - 1% | 4                | 1%      | 7 - 9                             | 2 - 3%            | 11 - 13                    | 4 - 5%   |
| MI    | 48      | 1%      | 45 - 101                            | 1 - 2%         | 122 - 148               | 1 - 2%   | 27               | 3%      | 34 - 49                           | 3 - 5%            | 61 - 76                    | 6 - 8%   |
| MN    | 6       | 0.2%    | 22 - 27                             | 0.6 - 1%       | 28 - 33                 | 0.8 - 1% | 2                | 2%      | 6 - 7                             | 6 - 7%            | 8 - 9                      | 8 - 9%   |
| MS    | 20      | 1%      | 27 - 36                             | 1 - 2%         | 47 - 56                 | 2 - 3%   | 15               | 2%      | 16 - 22                           | 2 - 3%            | 31 - 37                    | 5 - 6%   |
| MO    | 27      | 1%      | 53 - 66                             | 1 - 2%         | 80 - 93                 | 2 - 3%   | 12               | 3%      | 18 - 23                           | 4 - 5%            | 30 - 35                    | 7 - 8%   |
| MT    | 3       | 0.5%    | 6 - 7                               | 0.9 - 1%       | 9 - 10                  | 1 - 2%   | 0.04             | 1%      | 0.08 - 0.1                        | 2 - 3%            | 0.12 - 0.14                | 3 - 4%   |
| NE    | 4       | 0.3%    | 10 - 14                             | 0.8 - 1%       | 14 - 18                 | 1 - 2%   | 1                | 2%      | 2 - 3                             | 5 - 7%            | 4 - 5                      | 7 - 9%   |
| NV    | 10      | 1%      | 23 - 27                             | 1 - 2%         | 31 - 37                 | 2 - 3%   | 3                | 3%      | 6 - 8                             | 6 - 7%            | 9 - 11                     | 9 - 10%  |
| NH    | 2       | 0.3%    | 5 - 6                               | 0.6 - 1%       | 7 - 8                   | 0.8 - 1% | 0.1              | 1%      | 0.4 - 0.5                         | 4 - 5%            | 0.5 - 0.6                  | 6 - 7%   |
| NJ    | 30      | 0.5%    | 84 - 104                            | 1 - 2%         | 114 - 134               | 1 - 2%   | 21               | 2%      | 44 - 55                           | 5 - 6%            | 65 - 77                    | 8 - 9%   |
| NM    | 5       | 0.4%    | 15 - 19                             | 1 - 2%         | 21 - 25                 | 1 - 2%   | 1                | 2%      | 2 - 3                             | 6 - 8%            | 3 - 4                      | 8 - 10%  |
| NY    | 70      | 1%      | 163 - 203                           | 1 - 2%         | 234 - 273               | 1 - 2%   | 39               | 2%      | 112 - 139                         | 5 - 6%            | 151 - 178                  | 7 - 8%   |
| NC    | 31      | 1%      | 97 - 123                            | 1 - 3%         | 129 - 154               | 2 - 3%   | 20               | 2%      | 51 - 65                           | 4 - 6%            | 72 - 85                    | 6 - 7%   |
| ND    | 1       | 0.2%    | 3 - 4                               | 0.7 - 1%       | 4 - 5                   | 0.9 - 1% | 0.03             | 1%      | 0.11 - 0.13                       | 2 - 3%            | 0.1 - 0.2                  | 3 - 4%   |
| OH    | 46      | 1%      | 132 - 162                           | 1 - 2%         | 179 - 208               | 2 - 3%   | 25               | 3%      | 64 - 79                           | 7 - 9%            | 89 - 104                   | 10 - 12% |
| OK    | 23      | 1%      | 40 - 53                             | 1 - 2%         | 63 - 76                 | 2 - 3%   | 8                | 5%      | 11 - 15                           | 6 - 8%            | 20 - 23                    | 11 - 13% |
| OR    | 11      | 0.4%    | 32 - 45                             | 1 - 2%         | 42 - 56                 | 1 - 2%   | 2                | 3%      | 4 - 5                             | 7 - 11%           | 5 - 7                      | 10 - 14% |
| PA    | 37      | 0.4%    | 59 - 72                             | 0.6 - 1%       | 96 - 109                | 1 - 2%   | 23               | 3%      | 21 - 26                           | 2 - 3%            | 44 - 50                    | 5 - 6%   |
| RI    | 2       | 0.3%    | 7 - 8                               | 0.9 - 1%       | 9 - 10                  | 1 - 2%   | 1                | 2%      | 1 - 2                             | 4 - 5%            | 2 - 3                      | 6 - 7%   |
| SC    | 22      | 1%      | 48 - 65                             | 1 - 2%         | 70 - 87                 | 2 - 3%   | 15               | 2%      | 26 - 37                           | 3 - 5%            | 41 - 53                    | 5 - 6%   |
| SD    | 3       | 0.5%    | 7 - 8                               | 1 - 2%         | 9 - 11                  | 1 - 2%   | 0.1              | 2%      | 0.18 - 0.22                       | 4 - 5%            | 0.3 - 0.4                  | 6 - 7%   |
| TN    | 22      | 1%      | 52 - 63                             | 1 - 2%         | 74 - 85                 | 1 - 2%   | 11               | 2%      | 20 - 26                           | 3 - 4%            | 32 - 37                    | 5 - 6%   |
| TX    | 158     | 1%      | 232 - 301                           | 1 - 2%         | 390 - 459               | 2 - 3%   | 72               | 4%      | 83 - 114                          | 5 - 6%            | 155 - 186                  | 9 - 10%  |
| UT    | 6       | 0.4%    | 12 - 16                             | 0.9 - 1%       | 18 - 22                 | 1 - 2%   | 0.4              | 3%      | 0.8 - 1                           | 5 - 7%            | 1 - 2                      | 8 - 9%   |
| VT    | 2       | 0.4%    | 4 - 5                               | 1 - 2%         | 6 - 7                   | 1 - 2%   | 0.05             | 1%      | 0.06 - 0.07                       | 1 - 2%            | 0.1 - 0.12                 | 2 - 3%   |
| VA    | 30      | 1%      | 61 - 82                             | 1 - 2%         | 91 - 112                | 2 - 3%   | 20               | 2%      | 31 - 45                           | 3 - 5%            | 51 - 66                    | 5 - 7%   |
| WA    | 15      | 0.3%    | 32 - 40                             | 0.7 - 1%       | 47 - 55                 | 1 - 2%   | 3                | 2%      | 6 - 7                             | 4 - 5%            | 9 - 11                     | 6 - 7%   |
| WV    | 4       | 0.3%    | 7 - 10                              | 0.5 - 1%       | 11 - 14                 | 0.8 - 1% | 1                | 1%      | 1 - 2                             | 2 - 3%            | 1 - 2                      | 4 - 5%   |
| WI    | 21      | 1%      | 33 - 41                             | 0.8 - 1%       | 54 - 62                 | 1 - 2%   | 10               | 5%      | 12 - 15                           | 6 - 8%            | 22 - 25                    | 12 - 13% |
| WY    | 2       | 0.5%    | 4 - 5                               | 1 - 2%         | 5 - 7                   | 1 - 2%   | 0.1              | 3%      | 0.1 - 0.2                         | 4 - 5%            | 0.2 - 0.3                  | 6 - 8%   |

**Table S5. Current and Formerly Incarcerated Adults 2010 (in thousands)**

| State | Overall |         |                                     |                |                         |        | African American |         |                                   |                   |                            |          |
|-------|---------|---------|-------------------------------------|----------------|-------------------------|--------|------------------|---------|-----------------------------------|-------------------|----------------------------|----------|
|       | Curr.   | % Curr. | Est. Ex-Prisoners Lower-Upper Bound | % Ex-Prisoners | Total Lower-Upper Bound | % Tot. | Curr.            | % Curr. | Est. AA Ex-Pris Lower-Upper Bound | % AA Ex-Prisoners | Total AA Lower-Upper Bound | % Tot.   |
| AL    | 32      | 1%      | 75 - 92                             | 2 - 3%         | 107 - 124               | 3 - 4% | 19               | 2%      | 39 - 49                           | 4 - 5%            | 57 - 68                    | 6 - 7%   |
| AK    | 6       | 1%      | 19 - 23                             | 3 - 4%         | 25 - 28                 | 4 - 5% | 1                | 3%      | 1 - 2                             | 9 - 12%           | 2 - 3                      | 12 - 15% |
| AZ    | 40      | 1%      | 63 - 82                             | 1 - 2%         | 103 - 122               | 2 - 3% | 5                | 3%      | 10 - 13                           | 5 - 6%            | 15 - 18                    | 7 - 9%   |
| AR    | 16      | 1%      | 55 - 66                             | 2 - 3%         | 71 - 82                 | 3 - 4% | 7                | 2%      | 21 - 26                           | 7 - 8%            | 28 - 33                    | 9 - 10%  |
| CA    | 165     | 1%      | 826 - 1042                          | 3 - 4%         | 991 - 1208              | 4 - 5% | 47               | 2%      | 229 - 288                         | 12 - 15%          | 276 - 335                  | 15 - 18% |
| CO    | 23      | 1%      | 53 - 66                             | 1 - 2%         | 76 - 89                 | 2 - 3% | 4                | 3%      | 10 - 13                           | 6 - 8%            | 14 - 17                    | 9 - 10%  |
| CT    | 19      | 1%      | 44 - 55                             | 1 - 2%         | 63 - 74                 | 2 - 3% | 6                | 2%      | 18 - 24                           | 6 - 8%            | 24 - 29                    | 9 - 10%  |
| DE    | 7       | 1%      | 11 - 14                             | 1 - 2%         | 18 - 21                 | 2 - 3% | 4                | 3%      | 6 - 8                             | 4 - 5%            | 10 - 11                    | 7 - 8%   |
| FL    | 104     | 1%      | 244 - 308                           | 1 - 2%         | 349 - 412               | 2 - 3% | 51               | 2%      | 112 - 146                         | 5 - 7%            | 163 - 196                  | 7 - 9%   |
| GA    | 49      | 1%      | 133 - 180                           | 2 - 3%         | 182 - 229               | 2 - 3% | 31               | 1%      | 82 - 102                          | 4 - 5%            | 113 - 134                  | 5 - 6%   |
| HI    | 6       | 1%      | 10 - 13                             | 1 - 2%         | 16 - 19                 | 2 - 3% | 0.3              | 1%      | 0.5 - 0.6                         | 2 - 3%            | 0.8 - 0.9                  | 3 - 4%   |
| ID    | 7       | 1%      | 22 - 27                             | 1 - 2%         | 29 - 34                 | 2 - 3% | 0.2              | 2%      | 0.4 - 0.5                         | 5 - 6%            | 0.6 - 0.7                  | 7 - 9%   |
| IL    | 48      | 1%      | 223 - 277                           | 2 - 3%         | 272 - 325               | 2 - 3% | 28               | 2%      | 129 - 164                         | 9 - 12%           | 157 - 192                  | 11 - 14% |
| IN    | 28      | 1%      | 100 - 122                           | 2 - 3%         | 128 - 150               | 3 - 4% | 10               | 2%      | 37 - 46                           | 9 - 11%           | 47 - 57                    | 11 - 13% |
| IA    | 9       | 0.4%    | 36 - 44                             | 1 - 2%         | 45 - 54                 | 2 - 3% | 2                | 4%      | 5 - 6                             | 7 - 9%            | 7 - 8                      | 11 - 13% |
| KS    | 9       | 0.4%    | 35 - 44                             | 1 - 2%         | 44 - 53                 | 2 - 3% | 3                | 2%      | 10 - 13                           | 8 - 10%           | 13 - 16                    | 10 - 12% |
| KY    | 21      | 1%      | 79 - 98                             | 2 - 3%         | 100 - 118               | 3 - 4% | 6                | 2%      | 20 - 24                           | 8 - 10%           | 25 - 30                    | 10 - 12% |
| LA    | 39      | 1%      | 102 - 126                           | 3 - 4%         | 142 - 165               | 4 - 5% | 27               | 3%      | 67 - 85                           | 6 - 8%            | 93 - 112                   | 9 - 11%  |
| ME    | 2       | 0.2%    | 8 - 10                              | 0.7 - 1%       | 10 - 12                 | 1 - 2% | 0.1              | 1%      | 0.10 - 0.14                       | 1 - 1.3%          | 0.2 - 0.3                  | 2 - 2.2% |
| MD    | 23      | 1%      | 76 - 95                             | 1 - 2%         | 99 - 118                | 2 - 3% | 17               | 1%      | 50 - 63                           | 4 - 5%            | 66 - 80                    | 5 - 6%   |
| MA    | 11      | 0.2%    | 27 - 34                             | 1 - 2%         | 39 - 46                 | 1 - 2% | 3                | 1%      | 7 - 9                             | 1 - 2%            | 10 - 12                    | 2 - 3%   |
| MI    | 44      | 1%      | 100 - 144                           | 1 - 2%         | 144 - 186               | 2 - 3% | 23               | 2%      | 45 - 72                           | 4 - 7%            | 68 - 95                    | 7 - 9%   |
| MN    | 10      | 0.2%    | 41 - 50                             | 1 - 2%         | 51 - 60                 | 1 - 2% | 3                | 2%      | 10 - 13                           | 5 - 6%            | 13 - 16                    | 7 - 8%   |
| MS    | 21      | 1%      | 47 - 66                             | 2 - 3%         | 68 - 87                 | 3 - 4% | 14               | 2%      | 26 - 40                           | 3 - 5%            | 40 - 54                    | 5 - 7%   |
| MO    | 31      | 1%      | 106 - 130                           | 2 - 3%         | 137 - 161               | 3 - 4% | 12               | 2%      | 32 - 40                           | 6 - 8%            | 44 - 52                    | 9 - 10%  |
| MT    | 4       | 0.5%    | 12 - 15                             | 1 - 2%         | 16 - 18                 | 2 - 3% | 0.1              | 2%      | 0.18 - 0.22                       | 4 - 5%            | 0.27 - 0.31                | 7 - 8%   |
| NE    | 5       | 0.3%    | 14 - 21                             | 1 - 2%         | 19 - 26                 | 1 - 2% | 1                | 2%      | 3 - 5                             | 5 - 8%            | 4 - 6                      | 7 - 10%  |
| NV    | 13      | 1%      | 35 - 43                             | 1 - 2%         | 48 - 56                 | 2 - 3% | 4                | 2%      | 9 - 11                            | 5 - 6%            | 12 - 15                    | 7 - 8%   |
| NH    | 3       | 0.3%    | 8 - 10                              | 1 - 2%         | 11 - 13                 | 1 - 2% | 0.2              | 1%      | 0.5 - 1                           | 4 - 5%            | 0.7 - 1                    | 5 - 6%   |
| NJ    | 25      | 0.4%    | 110 - 135                           | 1 - 2%         | 135 - 160               | 2 - 3% | 15               | 2%      | 59 - 74                           | 6 - 8%            | 74 - 89                    | 8 - 10%  |
| NM    | 7       | 0.4%    | 25 - 32                             | 1 - 2%         | 32 - 39                 | 2 - 3% | 1                | 1%      | 3 - 4                             | 7 - 11%           | 4 - 5                      | 10 - 13% |
| NY    | 57      | 0.4%    | 186 - 238                           | 1 - 2%         | 243 - 295               | 2 - 3% | 28               | 1%      | 105 - 141                         | 4 - 6%            | 134 - 169                  | 5 - 7%   |
| NC    | 40      | 1%      | 103 - 133                           | 1 - 2%         | 143 - 173               | 2 - 3% | 21               | 1%      | 53 - 72                           | 3 - 5%            | 75 - 93                    | 5 - 6%   |
| ND    | 1       | 0.3%    | 6 - 7                               | 1 - 2%         | 7 - 9                   | 1 - 2% | 0.1              | 2%      | 0.2 - 0.3                         | 3 - 4%            | 0.3 - 0.4                  | 5 - 6%   |
| OH    | 52      | 1%      | 193 - 240                           | 2 - 3%         | 245 - 291               | 2 - 3% | 24               | 2%      | 85 - 109                          | 8 - 10%           | 110 - 133                  | 10 - 13% |
| OK    | 26      | 1%      | 62 - 85                             | 2 - 3%         | 88 - 111                | 3 - 4% | 8                | 4%      | 17 - 25                           | 8 - 12%           | 25 - 33                    | 12 - 15% |
| OR    | 14      | 0.5%    | 38 - 58                             | 1 - 2%         | 52 - 72                 | 2 - 3% | 1                | 2%      | 4 - 6                             | 6 - 11%           | 5 - 8                      | 8 - 13%  |
| PA    | 51      | 1%      | 95 - 116                            | 1 - 2%         | 147 - 167               | 1 - 2% | 25               | 2%      | 33 - 41                           | 3 - 4%            | 57 - 66                    | 5 - 6%   |
| RI    | 3       | 0.4%    | 9 - 13                              | 1 - 2%         | 12 - 17                 | 2 - 3% | 1                | 2%      | 2 - 4                             | 4 - 7%            | 3 - 5                      | 6 - 9%   |
| SC    | 24      | 1%      | 67 - 98                             | 2 - 3%         | 91 - 121                | 2 - 3% | 15               | 2%      | 37 - 61                           | 4 - 6%            | 52 - 76                    | 5 - 8%   |
| SD    | 3       | 1%      | 15 - 18                             | 2 - 3%         | 19 - 22                 | 3 - 4% | 0.2              | 3%      | 0.6 - 1                           | 7 - 9%            | 0.8 - 1                    | 10 - 12% |
| TN    | 27      | 1%      | 89 - 109                            | 2 - 3%         | 117 - 137               | 2 - 3% | 13               | 2%      | 40 - 51                           | 5 - 7%            | 53 - 64                    | 7 - 8%   |
| TX    | 174     | 1%      | 400 - 570                           | 2 - 3%         | 574 - 744               | 3 - 4% | 62               | 3%      | 142 - 219                         | 6 - 10%           | 204 - 281                  | 9 - 13%  |
| UT    | 7       | 0.4%    | 21 - 27                             | 1 - 2%         | 27 - 34                 | 1 - 2% | 0.5              | 2%      | 1 - 2                             | 5 - 7%            | 1 - 2                      | 7 - 9%   |
| VT    | 2       | 0.4%    | 11 - 15                             | 2 - 3%         | 13 - 17                 | 2 - 3% | 0.2              | 4%      | 0.4 - 0.5                         | 7 - 9%            | 0.6 - 1                    | 11 - 13% |
| VA    | 37      | 1%      | 87 - 125                            | 1 - 2%         | 124 - 162               | 2 - 3% | 23               | 2%      | 46 - 71                           | 4 - 6%            | 68 - 94                    | 6 - 8%   |
| WA    | 18      | 0.4%    | 84 - 100                            | 1 - 2%         | 102 - 118               | 2 - 3% | 3                | 2%      | 16 - 19                           | 7 - 9%            | 19 - 22                    | 9 - 11%  |
| WV    | 7       | 0.5%    | 13 - 18                             | 1 - 2%         | 20 - 25                 | 1 - 2% | 1                | 2%      | 1 - 2                             | 3 - 5%            | 2 - 3                      | 5 - 6%   |
| WI    | 23      | 1%      | 53 - 66                             | 1 - 2%         | 76 - 88                 | 1 - 2% | 10               | 4%      | 20 - 26                           | 8 - 10%           | 30 - 35                    | 12 - 14% |
| WY    | 2       | 0.5%    | 5 - 7                               | 1 - 2%         | 7 - 9                   | 1 - 2% | 0.1              | 2%      | 0.2 - 0.3                         | 5 - 7%            | 0.3 - 0.4                  | 7 - 9%   |

**Table S6. Adults with Felony Convictions 1980 (in thousands)**

| State | Overall |         |                                  |             |                         |            | African American |         |                                     |                |                            |          |
|-------|---------|---------|----------------------------------|-------------|-------------------------|------------|------------------|---------|-------------------------------------|----------------|----------------------------|----------|
|       | Curr.   | % Curr. | Est. Ex-Felons Lower-Upper Bound | % Ex-Felons | Total Lower-Upper Bound | % Tot.     | Curr.            | % Curr. | Est. AA Ex-Felons Lower-Upper Bound | % AA Ex-Felons | Total AA Lower-Upper Bound | % Tot.   |
| AL    | 19      | 1%      | 94 - 116                         | 3 - 4%      | 112 - 135               | 4 - 5%     | 9                | 1%      | 34 - 43                             | 5 - 7%         | 43 - 53                    | 7 - 8%   |
| AK    | 2       | 1%      | 4 - 5                            | 1 - 2%      | 5 - 6                   | 2 - 2.3%   | 0.1              | 1%      | 0.2 - 0.3                           | 2.6 - 3%       | 0.4 - 0.5                  | 4 - 5%   |
| AZ    | 16      | 1%      | 39 - 58                          | 2 - 3%      | 55 - 74                 | 3 - 4%     | 2                | 4%      | 5 - 7                               | 10 - 14%       | 7 - 9                      | 15 - 18% |
| AR    | 7       | 0.5%    | 13 - 17                          | 0.8 - 1%    | 21 - 25                 | 1 - 2%     | 3                | 1%      | 4 - 6                               | 2 - 2.5%       | 7 - 9                      | 3 - 4%   |
| CA    | 110     | 1%      | 495 - 745                        | 3 - 4%      | 605 - 855               | 3 - 5%     | 28               | 2%      | 97 - 136                            | 8 - 11%        | 124 - 164                  | 10 - 13% |
| CO    | 12      | 1%      | 60 - 76                          | 3 - 4%      | 72 - 87                 | 3 - 4%     | 1                | 2%      | 6 - 8                               | 9 - 11%        | 7 - 9                      | 11 - 14% |
| CT    | 11      | 0.5%    | 31 - 39                          | 1 - 2%      | 42 - 50                 | 1.8 - 2%   | 4                | 3%      | 9 - 11                              | 6 - 8%         | 13 - 15                    | 9 - 11%  |
| DE    | 3       | 1%      | 1.6 - 2                          | 0.4 - .5%   | 4 - 5                   | 1 - 1.2%   | 1                | 2%      | 1 - 1                               | 1 - 1.5%       | 2 - 2.28                   | 3 - 4%   |
| FL    | 56      | 1%      | 152 - 215                        | 2 - 3%      | 207 - 271               | 3 - 4%     | 20               | 2%      | 41 - 54                             | 5 - 6%         | 61 - 73                    | 7 - 9%   |
| GA    | 46      | 1%      | 83 - 105                         | 2 - 3%      | 129 - 150               | 3 - 4%     | 20               | 2%      | 35 - 46                             | 4 - 5%         | 56 - 66                    | 6 - 7%   |
| HI    | 4       | 1%      | 8 - 10                           | 1 - 1.5%    | 12 - 14                 | 1.8 - 2%   | 0.2              | 1%      | 0.07 - 0.1                          | 0.5 - 1%       | 0.2 - 0.3                  | 1.7 - 2% |
| ID    | 3       | 0.5%    | 10 - 12                          | 1.5 - 2%    | 13 - 15                 | 2 - 2.4%   | 0.1              | 1%      | 0.2 - 0.3                           | 4 - 6%         | 0.2 - 0.3                  | 5 - 7%   |
| IL    | 50      | 1%      | 98 - 106                         | 1 - 1.3%    | 148 - 155               | 1.8 - 1.9% | 20               | 2%      | 25 - 34                             | 2 - 3%         | 45 - 53                    | 4 - 5%   |
| IN    | 16      | 0.4%    | 64 - 78                          | 1.7 - 2%    | 80 - 94                 | 2 - 2.4%   | 4                | 2%      | 12.6 - 13                           | 4.8 - 5%       | 16.8 - 17                  | 6 - 7%   |
| IA    | 9       | 0.4%    | 27 - 34                          | 1 - 2%      | 36 - 43                 | 1.7 - 2%   | 1                | 3%      | 1.8 - 2                             | 7 - 9%         | 2.6 - 3.1                  | 10 - 12% |
| KS    | 9       | 1%      | 23 - 29                          | 1 - 2%      | 32 - 38                 | 1.9 - 2%   | 2                | 3%      | 4 - 5                               | 5 - 6%         | 6 - 7                      | 7 - 9%   |
| KY    | 21      | 1%      | 26 - 34                          | 1 - 1.3%    | 47 - 55                 | 1.8 - 2%   | 4                | 2%      | 4 - 5                               | 2 - 3%         | 7 - 9                      | 4 - 5%   |
| LA    | 22      | 1%      | 50 - 72                          | 2 - 2.5%    | 72 - 94                 | 2 - 3%     | 12               | 2%      | 27 - 34                             | 3 - 4%         | 39 - 46                    | 5 - 6%   |
| ME    | 3       | 0.3%    | 12 - 14                          | 1 - 2%      | 14 - 17                 | 1.7 - 2%   | 0.03             | 1%      | 0.11 - 0.13                         | 4 - 6%         | 0.13 - 0.16                | 6 - 7%   |
| MD    | 30      | 1%      | 65 - 93                          | 2 - 3%      | 95 - 114                | 3 - 4%     | 12               | 2%      | 36 - 47                             | 6 - 7%         | 48 - 59                    | 7 - 9%   |
| MA    | 11      | 0.3%    | 107 - 132                        | 2 - 3%      | 119 - 143               | 3 - 3.4%   | 3                | 2%      | 20 - 26                             | 14 - 18%       | 23 - 29                    | 16 - 20% |
| MI    | 44      | 1%      | 166 - 207                        | 2 - 3%      | 210 - 251               | 3 - 4%     | 15               | 2%      | 24 - 32                             | 3 - 4%         | 39 - 47                    | 5 - 6%   |
| MN    | 15      | 1%      | 42 - 52                          | 1 - 2%      | 56 - 67                 | 2 - 2.3%   | 1                | 4%      | 3 - 4                               | 9 - 12%        | 4 - 5                      | 13 - 16% |
| MS    | 11      | 1%      | 31 - 49                          | 2 - 3%      | 42 - 60                 | 2 - 3%     | 6                | 1%      | 16 - 23                             | 3 - 4%         | 22 - 30                    | 4 - 6%   |
| MO    | 18      | 1%      | 51 - 63                          | 1 - 2%      | 69 - 82                 | 2 - 2.3%   | 6                | 2%      | 15 - 19                             | 4 - 6%         | 20 - 24                    | 6 - 7%   |
| MT    | 3       | 1%      | 10 - 13                          | 1.8 - 2%    | 14 - 16                 | 2 - 3%     | 0.1              | 5%      | 0.07 - 0.1                          | 6 - 9%         | 0.1 - 0.2                  | 11 - 14% |
| NE    | 4       | 0.4%    | 17 - 22                          | 1.5 - 2%    | 21 - 27                 | 2 - 2.4%   | 1                | 2%      | 1.7 - 2                             | 6 - 8%         | 2 - 3                      | 8 - 9%   |
| NV    | 6       | 1%      | 6 - 8                            | 1 - 1.4%    | 12 - 14                 | 2 - 2.4%   | 2                | 5%      | 1 - 2                               | 4 - 5%         | 2.8 - 3.21                 | 9 - 10%  |
| NH    | 2       | 0.3%    | 12 - 15                          | 2 - 2.3%    | 14 - 17                 | 2 - 2.6%   | 0.1              | 2%      | 0.5 - 1                             | 20 - 25%       | 0.6 - 1                    | 22 - 27% |
| NJ    | 33      | 1%      | 124 - 155                        | 2 - 3%      | 157 - 188               | 3 - 3.5%   | 15               | 3%      | 52 - 67                             | 9 - 11%        | 67 - 82                    | 11 - 14% |
| NM    | 4       | 0.5%    | 11 - 15                          | 1 - 2%      | 15 - 20                 | 1.7 - 2%   | 1                | 4%      | 1.5 - 2                             | 10 - 13%       | 2 - 3                      | 14 - 17% |
| NY    | 70      | 1%      | 180 - 228                        | 1 - 2%      | 251 - 299               | 2 - 2.3%   | 33               | 2%      | 67 - 89                             | 4 - 6%         | 100 - 122                  | 6 - 8%   |
| NC    | 32      | 1%      | 36 - 69                          | 1 - 2%      | 68 - 101                | 1.6 - 2%   | 14               | 2%      | 15 - 19                             | 1.7 - 2%       | 29 - 33                    | 3 - 4%   |
| ND    | 1       | 0.3%    | 7 - 10                           | 1 - 2%      | 8 - 11                  | 1.7 - 2%   | 0.02             | 1%      | 0.15 - 0.2                          | 8 - 11%        | 0.17 - 0.2                 | 9 - 12%  |
| OH    | 37      | 0.5%    | 143 - 177                        | 1.8 - 2%    | 179 - 214               | 2 - 3%     | 14               | 2%      | 52 - 67                             | 7 - 9%         | 66 - 81                    | 9 - 11%  |
| OK    | 17      | 1%      | 61 - 77                          | 3 - 4%      | 78 - 94                 | 3.5 - 4%   | 4                | 3%      | 12 - 15                             | 9 - 11%        | 16 - 19                    | 12 - 14% |
| OR    | 14      | 1%      | 28 - 39                          | 1 - 2%      | 41 - 53                 | 2 - 3%     | 1                | 4%      | 1.5 - 2                             | 7 - 9%         | 2.5 - 3                    | 11 - 13% |
| PA    | 43      | 0.5%    | 152 - 190                        | 1.7 - 2%    | 195 - 233               | 2 - 3%     | 13               | 2%      | 36 - 47                             | 5 - 7%         | 49 - 60                    | 7 - 8%   |
| RI    | 5       | 1%      | 8 - 10                           | 1 - 1.4%    | 13 - 15                 | 1.8 - 2%   | 1                | 4%      | 1 - 2                               | 8 - 10%        | 2 - 3                      | 12 - 14% |
| SC    | 19      | 1%      | 42 - 58                          | 2 - 3%      | 61 - 76                 | 3 - 3.4%   | 8                | 1%      | 16 - 21                             | 3 - 3.4%       | 25 - 29                    | 4 - 5%   |
| SD    | 2       | 0.5%    | 7 - 9                            | 1.5 - 2%    | 9 - 11                  | 1.9 - 2%   | 0.03             | 2%      | 0.04 - 0.05                         | 3 - 4%         | 0.06 - .1                  | 4 - 5%   |
| TN    | 18      | 1%      | 37 - 47                          | 1 - 1.4%    | 55 - 64                 | 1.6 - 2%   | 6                | 1%      | 14 - 18                             | 3 - 4%         | 20 - 24                    | 4 - 5%   |
| TX    | 121     | 1%      | 175 - 246                        | 2 - 2.4%    | 296 - 367               | 3 - 4%     | 36               | 3%      | 46 - 62                             | 4 - 5%         | 82 - 98                    | 7 - 9%   |
| UT    | 4       | 0.5%    | 8 - 10                           | 0.8 - 1%    | 12 - 14                 | 1 - 2%     | 0.3              | 4%      | 0.4 - 0.5                           | 6 - 8%         | 0.7 - 0.8                  | 10 - 12% |
| VT    | 2       | 1%      | 6 - 8                            | 1.7 - 2%    | 8 - 10                  | 2 - 3%     | 0.01             | 2%      | 0.03 - 0.04                         | 4 - 5%         | .04 - .05                  | 6 - 7%   |
| VA    | 24      | 1%      | 62 - 98                          | 2 - 3%      | 86 - 122                | 2 - 3%     | 11               | 2%      | 22 - 34                             | 3 - 5%         | 33 - 45                    | 5 - 7%   |
| WA    | 30      | 1%      | 19 - 28                          | 0.6 - 1%    | 49 - 57                 | 1.6 - 2%   | 4                | 6%      | 1 - 3                               | 2 - 4%         | 6 - 7                      | 8 - 10%  |
| WV    | 3       | 0.2%    | 15 - 20                          | 1 - 1.5%    | 18 - 24                 | 1 - 2%     | 0.2              | 1%      | 1 - 2                               | 3 - 4%         | 1.5 - 2                    | 3 - 5%   |
| WI    | 16      | 0.5%    | 45 - 56                          | 1 - 2%      | 61 - 72                 | 1.8 - 2%   | 4                | 4%      | 9 - 12                              | 8 - 11%        | 13 - 16                    | 12 - 14% |
| WY    | 1       | 0.4%    | 4 - 6                            | 1 - 2%      | 5 - 7                   | 1.5 - 2%   | 0.04             | 2%      | 0.1 - 0.2                           | 4 - 7%         | 0.1 - 0.2                  | 6 - 9%   |

**Table S7. Adults with Felony Convictions 1990 (in thousands)**

| State | Overall |         |                                  |             |                         |          | African American |         |                                     |                |                            |          |
|-------|---------|---------|----------------------------------|-------------|-------------------------|----------|------------------|---------|-------------------------------------|----------------|----------------------------|----------|
|       | Curr.   | % Curr. | Est. Ex-Felons Lower-Upper Bound | % Ex-Felons | Total Lower-Upper Bound | % Tot.   | Curr.            | % Curr. | Est. AA Ex-Felons Lower-Upper Bound | % AA Ex-Felons | Total AA Lower-Upper Bound | % Tot.   |
| AL    | 41      | 1%      | 103 - 130                        | 3 - 4%      | 144 - 171               | 5 - 6%   | 23               | 3%      | 40 - 53                             | 6 - 8%         | 63 - 76                    | 9 - 11%  |
| AK    | 7       | 2%      | 9 - 11                           | 2 - 3%      | 16 - 18                 | 4 - 5%   | 1                | 5%      | 0.7 - 1                             | 5 - 10%        | 1 - 2                      | 10 - 15% |
| AZ    | 44      | 2%      | 67 - 98                          | 2 - 4%      | 111 - 142               | 4 - 5%   | 6                | 8%      | 9 - 14                              | 13 - 20%       | 15 - 20                    | 21 - 28% |
| AR    | 24      | 1%      | 20 - 28                          | 1 - 2%      | 45 - 53                 | 2.6 - 3% | 9                | 4%      | 9 - 13                              | 4 - 6%         | 18 - 23                    | 8 - 10%  |
| CA    | 324     | 1%      | 710 - 989                        | 3 - 4%      | 1034 - 1313             | 5 - 6%   | 97               | 7%      | 162 - 247                           | 12 - 19%       | 259 - 344                  | 20 - 26% |
| CO    | 24      | 1%      | 80 - 101                         | 3 - 4%      | 105 - 125               | 4 - 5%   | 4                | 4%      | 8 - 11                              | 9 - 12%        | 12 - 15                    | 13 - 16% |
| CT    | 35      | 1%      | 78 - 96                          | 3 - 4%      | 113 - 131               | 4 - 5%   | 14               | 8%      | 26 - 32                             | 14 - 17%       | 40 - 46                    | 21 - 24% |
| DE    | 9       | 2%      | 7 - 10                           | 1 - 2%      | 16 - 19                 | 3 - 4%   | 5                | 6%      | 3 - 4                               | 4 - 5%         | 8 - 9                      | 10 - 11% |
| FL    | 146     | 1%      | 559 - 666                        | 5 - 7%      | 705 - 812               | 7 - 8%   | 58               | 5%      | 180 - 233                           | 15 - 20%       | 238 - 291                  | 20 - 25% |
| GA    | 128     | 3%      | 183 - 235                        | 4 - 5%      | 311 - 363               | 7 - 8%   | 71               | 6%      | 77 - 104                            | 7 - 9%         | 148 - 175                  | 12 - 15% |
| HI    | 10      | 1%      | 22 - 23                          | 2 - 3%      | 32 - 33                 | 3 - 4%   | 0.5              | 3%      | 0.5 - 1                             | 3 - 4%         | 1 - 2                      | 6 - 7%   |
| ID    | 7       | 1%      | 17 - 21                          | 2 - 3%      | 24 - 28                 | 3 - 4%   | 0.1              | 3%      | 0.3 - 0.4                           | 10 - 13%       | 0.4 - 0.5                  | 13 - 16% |
| IL    | 85      | 1%      | 204 - 219                        | 2 - 3%      | 289 - 304               | 3 - 4%   | 46               | 4%      | 56 - 73                             | 5 - 6%         | 102 - 119                  | 9 - 10%  |
| IN    | 41      | 1%      | 127 - 155                        | 3 - 4%      | 168 - 196               | 4 - 5%   | 13               | 4%      | 28 - 35                             | 9 - 11%        | 40 - 48                    | 13 - 16% |
| IA    | 13      | 1%      | 38 - 48                          | 1 - 2%      | 51 - 60                 | 2 - 3%   | 2                | 5%      | 2 - 3                               | 8 - 11%        | 4 - 5                      | 13 - 16% |
| KS    | 20      | 1%      | 38 - 48                          | 2 - 3%      | 58 - 68                 | 3 - 4%   | 6                | 6%      | 8 - 9                               | 8 - 10%        | 13 - 15                    | 14 - 15% |
| KY    | 19      | 1%      | 54 - 67                          | 2 - 3%      | 73 - 87                 | 2 - 3%   | 5                | 3%      | 9 - 11                              | 5 - 6%         | 14 - 16                    | 7 - 9%   |
| LA    | 51      | 2%      | 69 - 98                          | 2 - 3%      | 121 - 150               | 4 - 5%   | 32               | 4%      | 39 - 56                             | 5 - 7%         | 72 - 88                    | 8 - 10%  |
| ME    | 6       | 1%      | 19 - 23                          | 2 - 3%      | 25 - 29                 | 2 - 3%   | 0.2              | 6%      | 0.1 - 0.2                           | 6 - 8%         | 0.3 - 0.4                  | 11 - 13% |
| MD    | 69      | 2%      | 127 - 175                        | 3 - 5%      | 196 - 244               | 5 - 7%   | 46               | 5%      | 64 - 101                            | 7 - 11%        | 110 - 146                  | 13 - 17% |
| MA    | 50      | 1%      | 130 - 162                        | 3 - 4%      | 180 - 212               | 4 - 5%   | 14               | 7%      | 26 - 34                             | 13 - 16%       | 40 - 48                    | 19 - 23% |
| MI    | 91      | 1%      | 229 - 284                        | 3 - 4%      | 320 - 375               | 5 - 6%   | 36               | 4%      | 43 - 57                             | 5 - 6%         | 78 - 93                    | 9 - 10%  |
| MN    | 27      | 1%      | 92 - 113                         | 3 - 4%      | 119 - 140               | 4 - 5%   | 4                | 7%      | 7 - 9                               | 14 - 18%       | 11 - 13                    | 21 - 25% |
| MS    | 20      | 1%      | 42 - 64                          | 2 - 3%      | 63 - 84                 | 3 - 5%   | 13               | 2%      | 21 - 37                             | 4 - 6%         | 35 - 51                    | 6 - 9%   |
| MO    | 45      | 1%      | 90 - 113                         | 2 - 3%      | 135 - 158               | 3 - 4%   | 16               | 4%      | 24 - 32                             | 7 - 9%         | 40 - 48                    | 11 - 13% |
| MT    | 6       | 1%      | 13 - 16                          | 2 - 3%      | 19 - 23                 | 3 - 4%   | 0.1              | 7%      | 0.1 - 0.2                           | 10 - 14%       | 0.2 - 0.3                  | 17 - 21% |
| NE    | 9       | 1%      | 22 - 28                          | 2 - 3%      | 32 - 37                 | 3 - 4%   | 2                | 5%      | 3 - 4                               | 7 - 10%        | 4 - 6                      | 12 - 15% |
| NV    | 15      | 2%      | 14 - 20                          | 1 - 2%      | 30 - 35                 | 3 - 4%   | 5                | 9%      | 3 - 4                               | 5 - 8%         | 8 - 9                      | 14 - 17% |
| NH    | 4       | 0.5%    | 15 - 19                          | 2 - 3%      | 19 - 23                 | 2 - 3%   | 0.2              | 3%      | 0.6 - 1                             | 12 - 16%       | 0.8 - 1                    | 15 - 19% |
| NJ    | 80      | 1%      | 141 - 182                        | 2 - 3%      | 221 - 262               | 4 - 5%   | 46               | 6%      | 59 - 80                             | 8 - 10%        | 105 - 125                  | 14 - 16% |
| NM    | 9       | 1%      | 28 - 35                          | 2 - 3%      | 37 - 44                 | 3 - 4%   | 1                | 6%      | 4 - 5                               | 21 - 29%       | 5 - 6                      | 27 - 35% |
| NY    | 168     | 1%      | 222 - 289                        | 1 - 2%      | 388 - 407               | 2 - 3%   | 83               | 4%      | 87 - 120                            | 4 - 6%         | 170 - 203                  | 8 - 10%  |
| NC    | 50      | 1%      | 98 - 140                         | 2 - 3%      | 147 - 190               | 3 - 4%   | 27               | 3%      | 41 - 53                             | 4 - 5%         | 68 - 80                    | 7 - 8%   |
| ND    | 2       | 0.5%    | 8 - 11                           | 1 - 2%      | 10 - 13                 | 2 - 3%   | 0.02             | 1%      | 0.1 - 0.2                           | 7 - 11%        | 0.2 - 0.3                  | 8 - 12%  |
| OH    | 72      | 1%      | 214 - 263                        | 2 - 3%      | 285 - 335               | 3 - 4%   | 34               | 4%      | 92 - 116                            | 11 - 14%       | 126 - 150                  | 16 - 19% |
| OK    | 36      | 2%      | 85 - 107                         | 4 - 5%      | 121 - 142               | 5 - 6%   | 10               | 7%      | 17 - 24                             | 12 - 16%       | 27 - 34                    | 18 - 23% |
| OR    | 36      | 2%      | 49 - 68                          | 2 - 3%      | 85 - 104                | 4 - 5%   | 3                | 10%     | 3 - 4                               | 8 - 14%        | 6 - 7                      | 18 - 24% |
| PA    | 114     | 1%      | 140 - 186                        | 1 - 2%      | 254 - 299               | 3 - 4%   | 41               | 5%      | 32 - 40                             | 4 - 5%         | 72 - 81                    | 9 - 10%  |
| RI    | 13      | 2%      | 18 - 23                          | 2 - 3%      | 31 - 36                 | 4 - 5%   | 3                | 11%     | 3 - 4                               | 12 - 16%       | 6 - 7                      | 23 - 27% |
| SC    | 28      | 1%      | 61 - 82                          | 2 - 3%      | 88 - 110                | 3 - 4%   | 16               | 2%      | 25 - 38                             | 4 - 5%         | 41 - 54                    | 6 - 8%   |
| SD    | 4       | 1%      | 15 - 18                          | 3 - 4%      | 18 - 21                 | 4 - 5%   | 0.1              | 5%      | 0.10 - 0.13                         | 7 - 8%         | 0.17 - 0.20                | 11 - 13% |
| TN    | 32      | 1%      | 60 - 77                          | 1 - 2%      | 92 - 109                | 2 - 3%   | 15               | 3%      | 21 - 28                             | 4 - 5%         | 36 - 43                    | 7 - 8%   |
| TX    | 321     | 3%      | 276 - 391                        | 2 - 3%      | 596 - 711               | 5 - 6%   | 119              | 9%      | 60 - 106                            | 4 - 8%         | 179 - 225                  | 13 - 16% |
| UT    | 8       | 1%      | 16 - 20                          | 1 - 2%      | 24 - 28                 | 2 - 3%   | 1                | 6%      | 0.8 - 1                             | 10 - 13%       | 1 - 2                      | 16 - 19% |
| VT    | 3       | 1%      | 10 - 13                          | 2 - 3%      | 13 - 15                 | 3 - 4%   | 0.03             | 3%      | 0.06 - 0.07                         | 5 - 7%         | 0.07 - 0.1                 | 8 - 10%  |
| VA    | 47      | 1%      | 88 - 135                         | 2 - 3%      | 135 - 182               | 3 - 4%   | 26               | 3%      | 34 - 60                             | 4 - 7%         | 59 - 86                    | 7 - 10%  |
| WA    | 60      | 2%      | 82 - 105                         | 2 - 3%      | 142 - 165               | 4 - 5%   | 8                | 9%      | 9 - 12                              | 10 - 13%       | 17 - 21                    | 19 - 22% |
| WV    | 5       | 0.4%    | 16 - 22                          | 1 - 2%      | 22 - 27                 | 1 - 2%   | 1                | 1%      | 1 - 2                               | 3 - 6%         | 2 - 3                      | 5 - 7%   |
| WI    | 25      | 1%      | 62 - 78                          | 1 - 2%      | 87 - 103                | 2 - 3%   | 7                | 5%      | 13 - 17                             | 9 - 12%        | 21 - 25                    | 14 - 17% |
| WY    | 4       | 1%      | 6 - 9                            | 2 - 3%      | 10 - 13                 | 3 - 4%   | 0.1              | 6%      | 0.1 - 0.3                           | 7 - 13%        | 0.3 - 0.4                  | 13 - 19% |

**Table S8. Adults with Felony Convictions 2000 (in thousands)**

| State | Overall |         |                                  |             |                         |          |       | African American |                                     |                |                            |          |  |
|-------|---------|---------|----------------------------------|-------------|-------------------------|----------|-------|------------------|-------------------------------------|----------------|----------------------------|----------|--|
|       | Curr.   | % Curr. | Est. Ex-Felons Lower-Upper Bound | % Ex-Felons | Total Lower-Upper Bound | % Tot.   | Curr. | % Curr.          | Est. AA Ex-Felons Lower-Upper Bound | % AA Ex-Felons | Total AA Lower-Upper Bound | % Tot.   |  |
| AL    | 64      | 2%      | 119 - 152                        | 4 - 5%      | 183 - 217               | 5 - 6%   | 34    | 4%               | 57 - 74                             | 7 - 9%         | 91 - 107                   | 11 -13%  |  |
| AK    | 7       | 2%      | 18 - 22                          | 4 - 5%      | 25 - 29                 | 6 - 7%   | 1     | 6%               | 1.7 - 2.4                           | 10 - 14%       | 2.7 - 3.3                  | 16 -20%  |  |
| AZ    | 82      | 2%      | 140 - 179                        | 4 - 5%      | 222 - 261               | 6 - 7%   | 9     | 7%               | 17 - 25                             | 12 - 19%       | 26 - 34                    | 19 -25%  |  |
| AR    | 51      | 3%      | 50 - 66                          | 3 - 4%      | 101 - 117               | 5 - 6%   | 22    | 8%               | 19 - 28                             | 7 - 10%        | 41 - 50                    | 15 -18%  |  |
| CA    | 531     | 2%      | 1150 - 1467                      | 5 - 6%      | 1681 - 1998             | 7 - 8%   | 193   | 10%              | 301 - 435                           | 16 - 23%       | 494 - 628                  | 27 -34%  |  |
| CO    | 44      | 1%      | 111 - 144                        | 4 - 5%      | 155 - 188               | 5 - 6%   | 8     | 6%               | 16 - 21                             | 12 - 16%       | 25 - 29                    | 19 -22%  |  |
| CT    | 45      | 2%      | 136 - 169                        | 5 - 7%      | 181 - 214               | 7 - 9%   | 18    | 8%               | 45 - 57                             | 20 - 26%       | 63 - 75                    | 29 -34%  |  |
| DE    | 16      | 2%      | 16 - 27                          | 3 - 5%      | 32 - 42                 | 5 - 7%   | 8     | 5%               | 8 - 13                              | 7 - 12%        | 16 - 21                    | 15 -20%  |  |
| FL    | 214     | 2%      | 958 - 1465                       | 8 - 12%     | 1172 - 1678             | 10 - 14% | 89    | 6%               | 335 - 481                           | 21 - 30%       | 424 - 570                  | 26 -36%  |  |
| GA    | 286     | 3%      | 243 - 437                        | 4 - 7%      | 529 - 723               | 9 - 12%  | 162   | 7%               | 115 - 222                           | 7 - 14%        | 277 - 384                  | 18 -24%  |  |
| HI    | 16      | 2%      | 32 - 39                          | 4 - 5%      | 48 - 55                 | 5 - 6%   | 1     | 3%               | 1 - 2                               | 5 - 6%         | 2 - 3                      | 7 -9%    |  |
| ID    | 16      | 2%      | 28 - 35                          | 3 - 4%      | 44 - 51                 | 5 - 6%   | 0.3   | 4%               | 0.6 - 0.7                           | 8 - 11%        | 0.9 - 1                    | 12 -15%  |  |
| IL    | 160     | 2%      | 320 - 393                        | 4 - 5%      | 579 - 553               | 5 - 6%   | 88    | 7%               | 142 - 181                           | 11 - 14%       | 229 - 268                  | 18 -21%  |  |
| IN    | 66      | 1%      | 215 - 275                        | 5 - 6%      | 281 - 341               | 6 - 8%   | 23    | 7%               | 63 - 79                             | 18 - 22%       | 86 - 102                   | 24 -29%  |  |
| IA    | 20      | 1%      | 61 - 75                          | 3 - 4%      | 82 - 96                 | 4 - 5%   | 4     | 8%               | 6 - 7                               | 13 - 16%       | 9 - 11                     | 21 -24%  |  |
| KS    | 17      | 1%      | 72 - 88                          | 4 - 5%      | 89 - 106                | 5 - 6%   | 6     | 5%               | 18 - 22                             | 16 - 20%       | 24 - 28                    | 21 -25%  |  |
| KY    | 38      | 1%      | 83 - 104                         | 3 - 4%      | 121 - 143               | 4 - 5%   | 11    | 5%               | 18 - 23                             | 9 - 11%        | 30 - 35                    | 14 -17%  |  |
| LA    | 95      | 3%      | 125 - 160                        | 4 - 5%      | 220 - 255               | 7 - 8%   | 65    | 7%               | 76 - 110                            | 8 - 11%        | 142 - 175                  | 15 -18%  |  |
| ME    | 6       | 1%      | 26 - 32                          | 2 - 3%      | 31 - 37                 | 3 - 4%   | 0.1   | 2%               | 0.3 - 0.4                           | 4 - 5%         | 0.4 - 0.5                  | 6 -7%    |  |
| MD    | 61      | 2%      | 174 - 219                        | 4 - 6%      | 235 - 281               | 6 - 7%   | 43    | 4%               | 96 - 148                            | 9 - 14%        | 139 - 191                  | 13 -18%  |  |
| MA    | 40      | 1%      | 193 - 237                        | 4 - 5%      | 233 - 277               | 5 - 6%   | 11    | 4%               | 44 - 56                             | 16 - 21%       | 56 - 68                    | 21 -25%  |  |
| MI    | 118     | 2%      | 185 - 244                        | 2 - 3%      | 304 - 363               | 4 - 5%   | 49    | 5%               | 48 - 75                             | 5 - 8%         | 97 - 124                   | 10 -13%  |  |
| MN    | 41      | 1%      | 159 - 195                        | 4 - 6%      | 200 - 237               | 6 - 7%   | 9     | 8%               | 17 - 21                             | 16 - 20%       | 26 - 30                    | 24 -29%  |  |
| MS    | 38      | 2%      | 62 - 81                          | 3 - 4%      | 100 - 119               | 5 - 6%   | 26    | 4%               | 35 - 59                             | 5 - 9%         | 61 - 85                    | 9 -13%   |  |
| MO    | 83      | 2%      | 142 - 179                        | 3 - 4%      | 225 - 262               | 5 - 6%   | 30    | 7%               | 40 - 53                             | 9 -12%         | 71 - 83                    | 17 -20%  |  |
| MT    | 10      | 1%      | 17 - 21                          | 2 - 3%      | 26 - 31                 | 4 - 5%   | 0.1   | 3%               | 0.2 - 0.3                           | 4 - 6%         | 0.3 - 0.4                  | 7 -9%    |  |
| NE    | 9       | 1%      | 34 - 44                          | 3 - 4%      | 44 - 53                 | 4 - 5%   | 6     | 4%               | 5 - 8                               | 11 - 15%       | 12 - 14                    | 24 -28%  |  |
| NV    | 23      | 2%      | 36 - 48                          | 3 - 4%      | 59 - 71                 | 4 - 5%   | 6     | 6%               | 10 - 13                             | 9 - 12%        | 16 - 19                    | 15 -18%  |  |
| NH    | 6       | 1%      | 21 - 27                          | 2 - 3%      | 26 - 33                 | 3 - 4%   | 1     | 8%               | 1 - 2                               | 19 - 23%       | 2 - 3                      | 26 -31%  |  |
| NJ    | 143     | 2%      | 271 - 344                        | 4 - 6%      | 414 - 488               | 7 - 8%   | 79    | 9%               | 134 - 174                           | 16 - 20%       | 213 - 253                  | 25 -30%  |  |
| NM    | 15      | 1%      | 50 - 61                          | 4 - 5%      | 65 - 76                 | 5 - 6%   | 1     | 4%               | 6 - 8                               | 17 - 22%       | 8 - 9                      | 21 -26%  |  |
| NY    | 231     | 2%      | 280 - 375                        | 2 - 3%      | 510 - 605               | 3 - 4%   | 125   | 5%               | 133 - 184                           | 6 - 8%         | 258 - 309                  | 11 -13%  |  |
| NC    | 71      | 1%      | 185 - 245                        | 3 - 4%      | 255 - 316               | 4 - 5%   | 41    | 3%               | 92 - 118                            | 8 - 10%        | 133 - 159                  | 11 -14%  |  |
| ND    | 4       | 1%      | 11 - 14                          | 2 - 3%      | 15 - 18                 | 3 - 4%   | 0.1   | 2%               | 0.3 - 0.4                           | 6 - 9%         | 0.3 - 0.5                  | 9 -11%   |  |
| OH    | 120     | 1%      | 318 - 396                        | 4 - 5%      | 438 - 516               | 5 - 6%   | 57    | 6%               | 140 - 178                           | 16 -20%        | 197 - 235                  | 22 -26%  |  |
| OK    | 52      | 2%      | 122 - 153                        | 5 - 6%      | 174 - 205               | 7 - 8%   | 15    | 8%               | 28 - 37                             | 15 -20%        | 43 - 52                    | 23 -28%  |  |
| OR    | 54      | 2%      | 76 - 103                         | 3 - 4%      | 131 - 157               | 5 - 6%   | 5     | 11%              | 5 - 8                               | 9 -17%         | 10 - 14                    | 20 -27%  |  |
| PA    | 163     | 2%      | 147 - 221                        | 1 - 2%      | 310 - 383               | 3 - 4%   | 67    | 8%               | 39 - 59                             | 4 -7%          | 102 - 126                  | 12 -15%  |  |
| RI    | 18      | 2%      | 33 - 42                          | 4 - 6%      | 51 - 60                 | 7 - 8%   | 4     | 12%              | 8 - 10                              | 21 -27%        | 12 - 14                    | 33 - 39% |  |
| SC    | 52      | 2%      | 87 - 112                         | 3 - 4%      | 139 - 164               | 5 - 6%   | 33    | 4%               | 43 - 67                             | 5 -14%         | 76 - 100                   | 9 -18%   |  |
| SD    | 7       | 1%      | 22 - 27                          | 4 - 5%      | 28 - 35                 | 5 - 6%   | 0.2   | 4%               | 0.2 - 0.3                           | 5 -6%          | 0.4 - 0.5                  | 9 -10%   |  |
| TN    | 62      | 1%      | 130 - 167                        | 3 - 4%      | 193 - 229               | 5 - 6%   | 30    | 5%               | 52 - 67                             | 8 -11%         | 82 - 97                    | 13 -15%  |  |
| TX    | 526     | 4%      | 638 - 831                        | 4 - 6%      | 1164 - 1356             | 8 - 9%   | 165   | 9%               | 203 - 296                           | 11 -16%        | 368 - 460                  | 20 -26%  |  |
| UT    | 16      | 1%      | 27 - 36                          | 2 - 3%      | 44 - 53                 | 3 - 4%   | 1     | 6%               | 1 - 2                               | 8 -11%         | 2 - 3                      | 14 -17%  |  |
| VT    | 5       | 1%      | 14 - 17                          | 3 - 4%      | 19 - 23                 | 4 - 5%   | 0.1   | 2%               | 0.1 - 0.2                           | 3 - 4%         | 0.2 - 0.3                  | 6 - 7%   |  |
| VA    | 67      | 1%      | 189 - 239                        | 4 - 5%      | 255 - 306               | 5 - 6%   | 40    | 4%               | 91 - 147                            | 9 -15%         | 131 - 187                  | 13 -19%  |  |
| WA    | 126     | 2%      | 110 - 196                        | 3 - 4%      | 236 - 322               | 5 - 7%   | 18    | 9%               | 16 - 27                             | 11 -17%        | 34 - 45                    | 22 -29%  |  |
| WV    | 9       | 1%      | 16 - 23                          | 1 - 2%      | 25 - 32                 | 1 - 2%   | 1     | 3%               | 2 - 3                               | 4 -6%          | 3 - 4                      | 6 -8%    |  |
| WI    | 54      | 1%      | 90 - 115                         | 2 - 3%      | 144 - 169               | 4 - 5%   | 21    | 11%              | 23 - 31                             | 12 -16%        | 44 - 52                    | 23 -27%  |  |
| WY    | 5       | 1%      | 11 - 14                          | 3 - 4%      | 16 - 19                 | 4 - 5%   | 0.2   | 5%               | 0.3 - 0.5                           | 7 -12%         | 0.5 - 1                    | 12 -17%  |  |



**Table S9. Adults with Felony Convictions 2010 (in thousands)**

| State | Overall |         |                                  |             |                         |          | African American |         |                                     |                |                            |          |
|-------|---------|---------|----------------------------------|-------------|-------------------------|----------|------------------|---------|-------------------------------------|----------------|----------------------------|----------|
|       | Curr.   | % Curr. | Est. Ex-Felons Lower-Upper Bound | % Ex-Felons | Total Lower-Upper Bound | % Tot.   | Curr.            | % Curr. | Est. AA Ex-Felons Lower-Upper Bound | % AA Ex-Felons | Total AA Lower-Upper Bound | % Tot.   |
| AL    | 86      | 2%      | 144 - 184                        | 4 - 5%      | 230 - 271               | 6 - 7%   | 45               | 5%      | 74 - 98                             | 8 - 11%        | 118 - 143                  | 13 - 16% |
| AK    | 15      | 3%      | 31 - 37                          | 6 - 7%      | 46 - 51                 | 6 - 9%   | 1                | 7%      | 2 - 3                               | 12 - 17%       | 4 - 5                      | 19 - 24% |
| AZ    | 104     | 2%      | 209 - 297                        | 4 - 6%      | 313 - 401               | 7 - 8%   | 12               | 6%      | 24 - 37                             | 11 - 18%       | 36 - 48                    | 17 - 24% |
| AR    | 65      | 3%      | 88 - 117                         | 4 - 5%      | 153 - 182               | 7 - 8%   | 25               | 8%      | 30 - 44                             | 9 - 14%        | 55 - 69                    | 17 - 21% |
| CA    | 486     | 2%      | 1698 - 2159                      | 6 - 8%      | 2183 - 2645             | 8 - 9%   | 146              | 8%      | 487 - 679                           | 26 - 36%       | 632 - 825                  | 33 - 44% |
| CO    | 55      | 2%      | 162 - 212                        | 4 - 6%      | 218 - 267               | 6 - 7%   | 8                | 5%      | 23 - 29                             | 14 - 18%       | 31 - 38                    | 19 - 23% |
| CT    | 53      | 2%      | 169 - 213                        | 6 - 8%      | 223 - 266               | 8 - 10%  | 16               | 6%      | 55 - 70                             | 19 - 25%       | 70 - 86                    | 25 - 31% |
| DE    | 12      | 2%      | 40 - 49                          | 6 - 7%      | 51 - 61                 | 7 - 9%   | 6                | 4%      | 18 - 23                             | 13 - 16%       | 24 - 29                    | 17 - 21% |
| FL    | 287     | 2%      | 1470 - 1940                      | 10 - 13%    | 1757 - 2227             | 12 - 15% | 103              | 5%      | 509 - 729                           | 23 - 33%       | 612 - 832                  | 27 - 37% |
| GA    | 276     | 4%      | 604 - 806                        | 8 - 11%     | 880 - 1081              | 12 - 15% | 152              | 7%      | 313 - 411                           | 15 - 19%       | 466 - 563                  | 22 - 26% |
| HI    | 17      | 2%      | 42 - 53                          | 4 - 5%      | 59 - 71                 | 6 - 7%   | 0.7              | 3%      | 2 - 3                               | 9 - 11%        | 3 - 4                      | 12 - 15% |
| ID    | 25      | 2%      | 73 - 87                          | 6 - 8%      | 99 - 113                | 9 - 10%  | .5               | 7%      | 1 - 2                               | 14 - 18%       | 1.7 - 2                    | 21 - 24% |
| IL    | 144     | 2%      | 465 - 585                        | 5 - 6%      | 609 - 730               | 6 - 8%   | 67               | 5%      | 211 - 273                           | 15 - 20%       | 278 - 340                  | 20 - 25% |
| IN    | 100     | 2%      | 380 - 467                        | 8 - 10%     | 479 - 566               | 10 - 12% | 31               | 7%      | 111 - 140                           | 26 - 33%       | 143 - 172                  | 33 - 40% |
| IA    | 22      | 1%      | 90 - 111                         | 4 - 5%      | 112 - 133               | 5 - 6%   | 4                | 7%      | 10 - 13                             | 15 - 19%       | 14 - 17                    | 22 - 26% |
| KS    | 19      | 1%      | 89 - 111                         | 4 - 5%      | 108 - 129               | 5 - 6%   | 6                | 4%      | 23 - 29                             | 18 - 22%       | 29 - 35                    | 22 - 27% |
| KY    | 63      | 2%      | 145 - 183                        | 4 - 6%      | 207 - 246               | 6 - 7%   | 14               | 6%      | 34 - 44                             | 13 - 17%       | 48 - 58                    | 19 - 23% |
| LA    | 112     | 3%      | 192 - 251                        | 6 - 7%      | 304 - 363               | 9 - 11%  | 68               | 7%      | 111 - 160                           | 11 - 15%       | 180 - 228                  | 17 - 22% |
| ME    | 8       | 1%      | 37 - 40                          | 3 - 4%      | 45 - 47                 | 4 - 5%   | 0.3              | 3%      | 0.5 - 0.6                           | 4 - 5%         | 0.8 - 1                    | 7 - 8%   |
| MD    | 64      | 1%      | 203 - 267                        | 5 - 6%      | 267 - 330               | 6 - 7%   | 41               | 3%      | 119 - 177                           | 9 - 14%        | 160 - 217                  | 12 - 17% |
| MA    | 55      | 1%      | 316 - 384                        | 6 - 7%      | 371 - 439               | 7 - 9%   | 14               | 4%      | 76 - 94                             | 21 - 27%       | 89 - 108                   | 25 - 30% |
| MI    | 142     | 2%      | 245 - 322                        | 3 - 4%      | 388 - 464               | 5 - 6%   | 66               | 6%      | 61 - 98                             | 6 - 9%         | 127 - 163                  | 12 - 16% |
| MN    | 59      | 2%      | 231 - 291                        | 6 - 7%      | 291 - 350               | 7 - 9%   | 12               | 6%      | 30 - 38                             | 15 - 19%       | 42 - 50                    | 21 - 25% |
| MS    | 55      | 3%      | 97 - 142                         | 4 - 6%      | 153 - 197               | 7 - 9%   | 34               | 4%      | 55 - 93                             | 7 - 12%        | 89 - 127                   | 12 - 16% |
| MO    | 106     | 2%      | 241 - 309                        | 5 - 7%      | 347 - 415               | 8 - 9%   | 34               | 7%      | 68 - 89                             | 13 - 17%       | 102 - 123                  | 20 - 24% |
| MT    | 14      | 2%      | 32 - 40                          | 4 - 5%      | 46 - 54                 | 6 - 7%   | 0.2              | 7%      | 0.4 - 0.5                           | 9 - 11%        | 0.6 - 0.8                  | 15 - 18% |
| NE    | 10      | 1%      | 45 - 57                          | 3 - 4%      | 55 - 67                 | 4 - 5%   | 2                | 3%      | 7 - 10                              | 12 - 16%       | 9 - 12                     | 15 - 19% |
| NV    | 26      | 1%      | 63 - 81                          | 3 - 4%      | 90 - 107                | 4 - 5%   | 6                | 4%      | 16 - 22                             | 9 - 13%        | 22 - 28                    | 13 - 16% |
| NH    | 8       | 1%      | 26 - 32                          | 2 - 3%      | 34 - 40                 | 3 - 4%   | 0.4              | 3%      | 2 - 3                               | 14 - 19%       | 2 - 3                      | 18 - 22% |
| NJ    | 100     | 2%      | 337 - 432                        | 5 - 7%      | 438 - 533               | 7 - 8%   | 48               | 5%      | 170 - 220                           | 18 - 24%       | 219 - 269                  | 23 - 29% |
| NM    | 28      | 2%      | 80 - 103                         | 5 - 7%      | 109 - 132               | 7 - 9%   | 2                | 5%      | 7 - 10                              | 19 - 26%       | 9 - 12                     | 24 - 31% |
| NY    | 167     | 1%      | 348 - 460                        | 2 - 3%      | 515 - 628               | 3 - 4%   | 69               | 3%      | 162 - 223                           | 7 - 9%         | 232 - 292                  | 9 - 12%  |
| NC    | 82      | 1%      | 259 - 335                        | 4 - 5%      | 341 - 417               | 5 - 6%   | 41               | 3%      | 128 - 168                           | 8 - 11%        | 169 - 209                  | 11 - 14% |
| ND    | 5       | 1%      | 19 - 24                          | 4 - 5%      | 24 - 30                 | 5 - 6%   | 0.2              | 5%      | 0.5 - 0.8                           | 9 - 12%        | 0.8 - 1                    | 13 - 17% |
| OH    | 118     | 1%      | 501 - 617                        | 6 - 7%      | 619 - 734               | 7 - 8%   | 48               | 5%      | 197 - 251                           | 19 - 24%       | 245 - 299                  | 23 - 28% |
| OK    | 51      | 2%      | 175 - 218                        | 6 - 8%      | 226 - 269               | 8 - 10%  | 14               | 6%      | 41 - 54                             | 19 - 25%       | 55 - 67                    | 25 - 31% |
| OR    | 64      | 2%      | 99 - 135                         | 3 - 5%      | 163 - 198               | 5 - 7%   | 5                | 8%      | 7 - 11                              | 11 - 18%       | 12 - 16                    | 19 - 26% |
| PA    | 205     | 2%      | 214 - 294                        | 2 - 3%      | 418 - 499               | 4 - 5%   | 76               | 7%      | 64 - 79                             | 6 - 8%         | 140 - 155                  | 13 - 15% |
| RI    | 22      | 3%      | 39 - 51                          | 5 - 6%      | 61 - 73                 | 7 - 9%   | 5                | 9%      | 8 - 12                              | 16 - 23%       | 13 - 16                    | 26 - 32% |
| SC    | 53      | 2%      | 132 - 179                        | 4 - 5%      | 185 - 232               | 5 - 7%   | 31               | 3%      | 72 - 109                            | 7 - 11%        | 103 - 141                  | 11 - 15% |
| SD    | 11      | 2%      | 35 - 43                          | 6 - 7%      | 45 - 54                 | 7 - 9%   | 0.4              | 5%      | 0.6 - 0.7                           | 7 - 9%         | 1 - 1.2                    | 12 - 15% |
| TN    | 94      | 2%      | 215 - 272                        | 4 - 6%      | 309 - 366               | 6 - 8%   | 38               | 5%      | 90 - 118                            | 12 - 15%       | 129 - 156                  | 17 - 20% |
| TX    | 532     | 3%      | 1074 - 1384                      | 6 - 8%      | 1606 - 1917             | 9 - 10%  | 153              | 7%      | 298 - 437                           | 14 - 20%       | 451 - 590                  | 21 - 27% |
| UT    | 20      | 1%      | 47 - 63                          | 2 - 3%      | 67 - 83                 | 4 - 5%   | 1                | 5%      | 2 - 3                               | 10 - 13%       | 3 - 4                      | 14 - 17% |
| VT    | 5       | 1%      | 23 - 31                          | 5 - 6%      | 29 - 36                 | 6 - 7%   | .3               | 6%      | 0.6 - 0.7                           | 11 - 13%       | 0.9 - 1                    | 17 - 20% |
| VA    | 100     | 2%      | 277 - 395                        | 4 - 6%      | 376 - 494               | 6 - 8%   | 53               | 4%      | 153 - 239                           | 13 - 20%       | 206 - 291                  | 17 - 24% |
| WA    | 53      | 1%      | 318 - 401                        | 6 - 8%      | 371 - 454               | 7 - 9%   | 9                | 4%      | 46 - 57                             | 22 - 27%       | 54 - 66                    | 26 - 32% |
| WV    | 16      | 1%      | 24 - 31                          | 1 - 2%      | 39 - 47                 | 2 - 3%   | 2                | 3%      | 3 - 4                               | 5 - 7%         | 4 - 6                      | 8 - 11%  |
| WI    | 66      | 2%      | 125 - 167                        | 3 - 4%      | 192 - 233               | 4 - 5%   | 22               | 9%      | 36 - 48                             | 14 - 19%       | 58 - 70                    | 23 - 28% |
| WY    | 6       | 1%      | 16 - 23                          | 4 - 5%      | 23 - 29                 | 5 - 6%   | 0.2              | 5%      | 0.4 - 0.8                           | 10 - 17%       | 0.6 - 1                    | 15 - 22% |

**Figure S1 - Correctional Populations in the United States, 1980-2011**

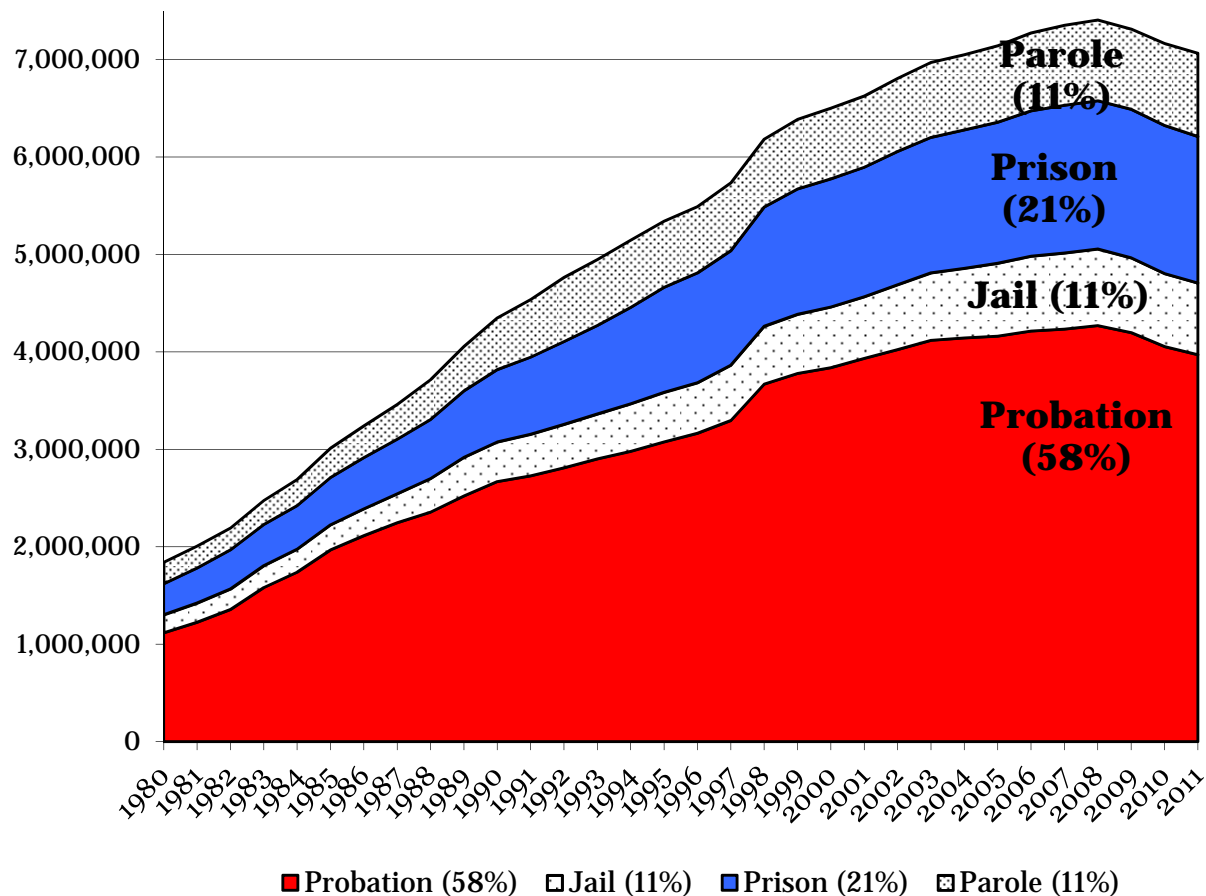

Supplement: NIHMS963104-supplement-Supplementary_Material_1.pdf [file NIHMS963104-supplement-Supplementary_Material_1.pdf]
